# Supplementary material for: Extensive age-dependent loss of antibody diversity in naturally short-lived turquoise killifish
Source: eLife journal article supplement (doi:10.7554/elife.65117), 2022-02-07
Supplement: supp [file elife-65117-supp-v1.zip]

Archive with 22 entries (22 files):
- elife_poa_e65117_Transparent_Reporting_File.pdf
- elife_poa_e65117_Supplementary_file_1.xlsx
- elife_poa_e65117_Figure_1_figure_supplement_1.png
- elife_poa_e65117_Figure_1_figure_supplement_2.png
- elife_poa_e65117_Figure_1_figure_supplement_3.png
- elife_poa_e65117_Figure_2_figure_supplement_1.png
- elife_poa_e65117_Figure_2_figure_supplement_2.png
- elife_poa_e65117_Figure_2_figure_supplement_3.png
- elife_poa_e65117_Figure_2_figure_supplement_4.png
- elife_poa_e65117_Figure_3_figure_supplement_1.png
- elife_poa_e65117_Figure_3_figure_supplement_2.png
- elife_poa_e65117_Figure_3_figure_supplement_3.png
- elife_poa_e65117_Figure_3_figure_supplement_4.png
- elife_poa_e65117_Figure_4_figure_supplement_5.png
- elife_poa_e65117_Figure_4_figure_supplement_1.png
- elife_poa_e65117_Figure_4_figure_supplement_2.png
- elife_poa_e65117_Figure_4_figure_supplement_3.png
- elife_poa_e65117_Figure_4_figure_supplement_4.png
- elife_poa_e65117_Figure_5_figure_supplement_1.png
- elife_poa_e65117_Figure_6_figure_supplement_1.png
- elife_poa_e65117_Figure_6_figure_supplement_2.png
- elife_poa_e65117_Figure_6_figure_supplement_3.png
