# Supplementary material for: Extensive age-dependent loss of antibody diversity in naturally short-lived turquoise killifish
Source: eLife journal article supplement (doi:10.7554/elife.65117), 2022-02-07
Supplement: supp [file elife_poa_e65117_Supplementary_file_1.xlsx]

## Sheet: INDEX
Supplementary Table files for Bradshaw et al. (2021), “Extensive age-dependent loss of antibody diversity in naturally short-lived turquoise killifish”
Table	Description
1	Software versions used in computational analyses
2	Summary of killifish used in IgSeq pilot and aging experiments all fish are GRZ-AD strain and male, and hatched on 9th May 2016
3	Summary of killifish used in IgSeq gut-microbiota transfer experiment. All fish are GRZ-Bellemans strain and male
4	IDs and death weights of all individual turquoise killifish used in IgSeq aging experiment
5	Individual killifish samples used in IgSeq gut-microbiota transfer
6	Gene ontology terms identified by Gene Set Enrichment Analysis as being significantly associated with killifish repertoire diversity, controlling for age, in at least four different diversity orders
7	Parent terms used to identify immune-associated Gene Ontology terms
8	Master-mix components for reverse transcription reaction used in library preparation protocol (per sample)
9	Overall PCR thermocycler protocol for library preparation protocol (see Supplemental Table 10 for missing parameter values)
10	Specific PCR protocols used for different stages of N. furzeri immunoglobulin sequencing library preparation protocol
11	PCR cycle numbers during N. furzeri IgSeq library preparation protocol
12	Bead cleanups during N. furzeri IgSeq library preparation protocol
13	Primers and oligonucleotides used in N. furzeri IgSeq library preparation protocol
14	i5 index sequences
15	i7 index sequences

## Sheet: Supplementary File 1
Supplementary File 1. Software versions used in computational analyses
Program	Version
Basemount	0.15.96.2154
BLAST	2.7.1
CD-HIT-EST	4.6.8
Change-O	0.4.5
EMBOSS (FUZZNUC)	6.6.0
IgBLAST	1.7.0
IGoR	1.3.0
IMGT/DomainGapAlign	4.9.2
PRANK	v.170427
pRESTO	0.5.10
Primer3	2.3.6
Python 2	2.7.14
Python 3	3.6.4
R	3.4.1 / 3.5.2
SAMtools	1.9
sed	4.2.2
seqtk	1.3
Snakemake	5.3.0
VSEARCH	2.8.0

## Sheet: Supplementary File 2a
Supplementary File 2a. Summary of killifish used in IgSeq pilot and aging experiments all fish are GRZ-AD strain and male, and hatched on 9th May 2016.
Group	# Fish	Death date	Age (d)	Age (wk)	Mean weight (g)
1	10	2016-06-17	39	5.57	1.3
2	10	2016-07-04	56	8	1.37
3	10	2016-07-21	73	10.4	1.76
4	2	2016-09-14	128	18.3	2.3

## Sheet: Supplementary File 2b
Supplementary File 2b. Summary of killifish used in IgSeq gut-microbiota transfer experiment. All fish are GRZ-Bellemans strain and male.
Group	Age (wk)	# Fish (sequenced / total)	Antibiotic treatment?	Microbiota transfer?
YI_6	6	4 / 4	No	No
WT_16	16	3 / 4	No	No
ABX_16	16	4 / 4	Yes	No
SMT_16	16	3 / 4	Yes	Yes (9.5wk donor, 9.5wk recipient)
YMT_16	16	4 / 4	Yes	Yes (6wk donor, 9.5wk recipient)

## Sheet: Supplementary File 2c
Supplementary File 2c. IDs and death weights of all individual turquoise killifish used in IgSeq aging experiment (Supplementary File 2a).
Group	#	ID	Death weight (g)
1	1	grz-AD_4194_E	1.24
1	2	grz-AD_4107_E	1.39
1	3	grz-AD_4127_E	1.29
1	4	grz-AD_4204_E	1.35
1	5	grz-AD_4189_E	1.43
1	6	grz-AD_4160_E	0.68
1	7	grz-AD_4164_E	1.57
1	8	grz-AD_4171_E	1.4
1	9	grz-AD_4200_E	1.42
1	10	grz-AD_4131_E	1.27
2	1	grz-AD_4159_E	1.37
2	2	grz-AD_4179_E	1.47
2	3	grz-AD_4152_E	1.33
2	4	grz-AD_4132_E	1.35
2	5	grz-AD_4177_E	1.22
2	6	grz-AD_4158_E	1.51
2	7	grz-AD_4182_E	1.12
2	8	grz-AD_4202_E	1.54
2	9	grz-AD_4143_E	1.28
2	10	grz-AD_4201_E	1.55
3	1	grz-AD_4155_E	2.06
3	2	grz-AD_4193_E	1.92
3	3	grz-AD_4170_E	1.8
3	4	grz-AD_4135_E	1.65
3	5	grz-AD_4190_E	1.87
3	6	grz-AD_4099_E	1.94
3	7	grz-AD_4198_E	1.49
3	8	grz-AD_4024_E	1.73
3	9	grz-AD_4044_E	1.53
3	10	grz-AD_4117_E	1.57
4	1	grz-AD_4173_E	2.2
4	2	grz-AD_4197_E	2.4

## Sheet: Supplementary File 2d
Supplementary File 2d. Individual killifish samples used in IgSeq gut-microbiota transfer (Supplementary File 2b).
Fish ID	Group	RNA Integrity Number	Date of library prep	Sequenced?	Functional Analysis (RNAseq)
1271	ABX_16	7.7	2018-11-20	Yes	No (not enough RNA for RNAseq)
1274	ABX_16	7.3	2018-12-01	Yes	No (not enough RNA for RNAseq)
1309	ABX_16	6.9	2018-12-01	Yes	No (not enough RNA for RNAseq)
dash	ABX_16	6.8	2018-12-01	Yes	No (not enough RNA for RNAseq)
1015	SMT_16	7	2018-11-20	Yes	Yes
1298	SMT_16	5.5	2018-11-20	Yes	Yes
1301	SMT_16	5.9	2018-11-20	Yes	Yes
402	WT_16	7	2018-11-20	Yes	Yes
938	WT_16	7.8	2018-11-20	Yes	Yes
940	WT_16	7.2	2018-11-20	Yes	Yes
1403	YI_6	5.5	2018-11-20	Yes	Yes
1409	YI_6	6.4	2018-12-01	Yes	Yes
1412	YI_6	6.7	2018-11-20	Yes	Yes
1414	YI_6	5.5	2018-11-20	Yes	Yes
1009	YMT_16	7	2018-11-20	Yes	Yes
1026	YMT_16	6.3	2018-11-20	Yes	Yes
1305	YMT_16	7.3	2018-11-20	Yes	Yes
999	YMT_16	7.1	2018-12-01	Yes	Yes
400	WT_16	7.1	—	No (not enough RNA)	No (not enough RNA)
1005	SMT_16	4.4	—	No (RNA integrity too low)	No (RNA integrity too low)

## Sheet: Supplementary File 3a
Supplementary File 3a. Gene ontology terms identified by Gene Set Enrichment Analysis as being significantly associated with killifish repertoire diversity, controlling for age, in at least four different diversity orders. Ranks are determined based on absolute Normalized Enrichment Value (NES), and reported both for all significantly enriched GO terms and for positively enriched terms only. Repo…
GO ID	Description	# Enriched Orders	NES	Rank (positive)	Rank (all)	P-value
GO:0050853	B cell receptor signaling pathway	6	2.4 ± 0.12	1 ± 0	1 ± 0	0 ± 0
GO:0050900	leukocyte migration	6	1.8 ± 0.06	25 ± 7.6	68 ± 13.6	0 ± 0.001
GO:0042100	B cell proliferation	5	2 ± 0.14	8 ± 5	23 ± 10.5	0.01 ± 0.011
GO:0048821	erythrocyte development	4	2.1 ± 0.19	4 ± 1.7	10 ± 5.8	0.01 ± 0.015
GO:0032675	regulation of interleukin-6 production	4	1.9 ± 0.08	14 ± 5.9	43 ± 17.7	0.01 ± 0.014
GO:0030449	regulation of complement activation	4	-1.8 ± 0.07	42 ± 23.6	67 ± 40.9	0.02 ± 0.013
GO:0002521	leukocyte differentiation	4	1.5 ± 0.09	36 ± 13.9	122 ± 35.4	0.02 ± 0.017
GO:0046649	lymphocyte activation	4	1.5 ± 0.11	36 ± 13.4	123 ± 34	0.01 ± 0.008

## Sheet: Supplementary File 3b
Supplementary File 3b. Parent terms used to identify immune-associated Gene Ontology terms. Any term that is a descendent of any of these terms was identified as an immune term.
GO ID	Description
GO:0002376	Immune system process
GO:0002682	Regulation of immune system processes
GO:0002764	Immune response regulating signaling pathway
GO:0001816	Cytokine production
GO:0019221	Cytokine mediated signaling pathway
GO:0006952	Defense response
GO:0031347	Regulation of defense response
GO:0070661	Leukocyte proliferation

## Sheet: Supplementary File 4a
Supplementary File 4a. Master-mix components for reverse transcription reaction used in library preparation protocol (per sample).
Volume (μl)	Component	Initial concentration
2	SMARTScribe reverse transcriptase	100 U μl-1
3	SMARTScribe first-strand buffer	5×
2	SmartNNNa barcoded TSA	10 μM
2	DTT	20 mM
2	dNTP mix	10 μM per nucleotide
0.5	RNasin RNase inhibitor	40 U μl-1

## Sheet: Supplementary File 4b
Supplementary File 4b. Overall PCR thermocycler protocol for library preparation protocol (see Supplementary File 4c for missing parameter values).
Step	Temperature (℃)	Duration (s)	# Cycles
Initial denaturation	95	180	1
Denaturation	98	20	nc (see Supplementary File 4c)
Annealing	Ta (see Supplementary File 4c)	15
Extension	72	text (see Supplementary File 4c)
Final extension	72	text × 4 (see Supplementary File 4c)	1

[truncated: 6 more sheets: Supplementary File 4c, Supplementary File 4d, Supplementary File 4e, Supplementary File 5a, Supplementary File 5b, Supplementary File 5c]
