# Supplementary material for: Extensive age-dependent loss of antibody diversity in naturally short-lived turquoise killifish
Source: eLife. 2022 Feb 7;11:e65117. doi: 10.7554/eLife.65117 (PMC8880994; doi:10.7554/eLife.65117)
Supplement: Supplementary file 1. [file elife-65117-supp1.xlsx]

## Sheet: Supplementary File 1
Supplementary File 1. Software versions used in computational analyses
Program	Version
Basemount	0.15.96.2154
BLAST	2.7.1
CD-HIT-EST	4.6.8
Change-O	0.4.5
EMBOSS (FUZZNUC)	6.6.0
IgBLAST	1.7.0
IGoR	1.3.0
IMGT/DomainGapAlign	4.9.2
PRANK	v.170427
pRESTO	0.5.10
Primer3	2.3.6
Python 2	2.7.14
Python 3	3.6.4
R	3.4.1 / 3.5.2
SAMtools	1.9
sed	4.2.2
seqtk	1.3
Snakemake	5.3.0
VSEARCH	2.8.0
