# Supplementary material for: Extensive age-dependent loss of antibody diversity in naturally short-lived turquoise killifish
Source: eLife. 2022 Feb 7;11:e65117. doi: 10.7554/eLife.65117 (PMC8880994; doi:10.7554/eLife.65117)
Supplement: Supplementary file 2. — (a) Summary of killifish used in IgSeq pilot and aging experiments. All fish are GRZ-AD strain and male, and hatched on May 9, 2016. (b) Summary of killifish used in IgSeq gut-microbiota transfer experiment. All fish are GRZ-Bellemans strain and male. (c) IDs and death weights of all individual turquoise killifish used in IgSeq aging experiment (a). (d) Individual killifish samples used in IgSeq gut-microbiota transfer (b). [file elife-65117-supp2.xlsx]

## Sheet: Supplementary File 2a
Supplementary File 2a. Summary of killifish used in IgSeq pilot and aging experiments all fish are GRZ-AD strain and male, and hatched on 9th May 2016.
Group	# Fish	Death date	Age (d)	Age (wk)	Mean weight (g)
1	10	2016-06-17	39	5.57	1.3
2	10	2016-07-04	56	8	1.37
3	10	2016-07-21	73	10.4	1.76
4	2	2016-09-14	128	18.3	2.3

## Sheet: Supplementary File 2b
Supplementary File 2b. Summary of killifish used in IgSeq gut-microbiota transfer experiment. All fish are GRZ-Bellemans strain and male.
Group	Age (wk)	# Fish (sequenced / total)	Antibiotic treatment?	Microbiota transfer?
YI_6	6	4 / 4	No	No
WT_16	16	3 / 4	No	No
ABX_16	16	4 / 4	Yes	No
SMT_16	16	3 / 4	Yes	Yes (9.5wk donor, 9.5wk recipient)
YMT_16	16	4 / 4	Yes	Yes (6wk donor, 9.5wk recipient)

## Sheet: Supplementary File 2c
Supplementary File 2c. IDs and death weights of all individual turquoise killifish used in IgSeq aging experiment (Supplementary File 2a).
Group	#	ID	Death weight (g)
1	1	grz-AD_4194_E	1.24
1	2	grz-AD_4107_E	1.39
1	3	grz-AD_4127_E	1.29
1	4	grz-AD_4204_E	1.35
1	5	grz-AD_4189_E	1.43
1	6	grz-AD_4160_E	0.68
1	7	grz-AD_4164_E	1.57
1	8	grz-AD_4171_E	1.4
1	9	grz-AD_4200_E	1.42
1	10	grz-AD_4131_E	1.27
2	1	grz-AD_4159_E	1.37
2	2	grz-AD_4179_E	1.47
2	3	grz-AD_4152_E	1.33
2	4	grz-AD_4132_E	1.35
2	5	grz-AD_4177_E	1.22
2	6	grz-AD_4158_E	1.51
2	7	grz-AD_4182_E	1.12
2	8	grz-AD_4202_E	1.54
2	9	grz-AD_4143_E	1.28
2	10	grz-AD_4201_E	1.55
3	1	grz-AD_4155_E	2.06
3	2	grz-AD_4193_E	1.92
3	3	grz-AD_4170_E	1.8
3	4	grz-AD_4135_E	1.65
3	5	grz-AD_4190_E	1.87
3	6	grz-AD_4099_E	1.94
3	7	grz-AD_4198_E	1.49
3	8	grz-AD_4024_E	1.73
3	9	grz-AD_4044_E	1.53
3	10	grz-AD_4117_E	1.57
4	1	grz-AD_4173_E	2.2
4	2	grz-AD_4197_E	2.4

## Sheet: Supplementary File 2d
Supplementary File 2d. Individual killifish samples used in IgSeq gut-microbiota transfer (Supplementary File 2b).
Fish ID	Group	RNA Integrity Number	Date of library prep	Sequenced?	Functional Analysis (RNAseq)
1271	ABX_16	7.7	2018-11-20	Yes	No (not enough RNA for RNAseq)
1274	ABX_16	7.3	2018-12-01	Yes	No (not enough RNA for RNAseq)
1309	ABX_16	6.9	2018-12-01	Yes	No (not enough RNA for RNAseq)
dash	ABX_16	6.8	2018-12-01	Yes	No (not enough RNA for RNAseq)
1015	SMT_16	7	2018-11-20	Yes	Yes
1298	SMT_16	5.5	2018-11-20	Yes	Yes
1301	SMT_16	5.9	2018-11-20	Yes	Yes
402	WT_16	7	2018-11-20	Yes	Yes
938	WT_16	7.8	2018-11-20	Yes	Yes
940	WT_16	7.2	2018-11-20	Yes	Yes
1403	YI_6	5.5	2018-11-20	Yes	Yes
1409	YI_6	6.4	2018-12-01	Yes	Yes
1412	YI_6	6.7	2018-11-20	Yes	Yes
1414	YI_6	5.5	2018-11-20	Yes	Yes
1009	YMT_16	7	2018-11-20	Yes	Yes
1026	YMT_16	6.3	2018-11-20	Yes	Yes
1305	YMT_16	7.3	2018-11-20	Yes	Yes
999	YMT_16	7.1	2018-12-01	Yes	Yes
400	WT_16	7.1	—	No (not enough RNA)	No (not enough RNA)
1005	SMT_16	4.4	—	No (RNA integrity too low)	No (RNA integrity too low)
