# Supplementary material for: Extensive age-dependent loss of antibody diversity in naturally short-lived turquoise killifish
Source: eLife. 2022 Feb 7;11:e65117. doi: 10.7554/eLife.65117 (PMC8880994; doi:10.7554/eLife.65117)
Supplement: Supplementary file 3. — (a) Gene ontology (GO) terms identified by gene set enrichment analysis as being significantly associated with killifish repertoire diversity, controlling for age, in at least four different diversity orders. Ranks are determined based on absolute normalized enrichment value (NES), and reported both for all significantly enriched GO terms and for positively enriched terms only. Reported p-values have been adjusted for multiple testing using the Benjamini-Hochberg method (Benjamini and Hochberg, 1995) (Materials and methods). NES, rank, and p-value are summarized across all diversity orders for which a given GO term is significantly enriched, reported as mean ± standard deviation. (b) Parent terms used to identify immune-associated GO terms. Any term that is a descendant of any of these terms was identified as an immune term. [file elife-65117-supp3.xlsx]

## Sheet: Supplementary File 3a
Supplementary File 3a. Gene ontology terms identified by Gene Set Enrichment Analysis as being significantly associated with killifish repertoire diversity, controlling for age, in at least four different diversity orders. Ranks are determined based on absolute Normalized Enrichment Value (NES), and reported both for all significantly enriched GO terms and for positively enriched terms only. Repo…
GO ID	Description	# Enriched Orders	NES	Rank (positive)	Rank (all)	P-value
GO:0050853	B cell receptor signaling pathway	6	2.4 ± 0.12	1 ± 0	1 ± 0	0 ± 0
GO:0050900	leukocyte migration	6	1.8 ± 0.06	25 ± 7.6	68 ± 13.6	0 ± 0.001
GO:0042100	B cell proliferation	5	2 ± 0.14	8 ± 5	23 ± 10.5	0.01 ± 0.011
GO:0048821	erythrocyte development	4	2.1 ± 0.19	4 ± 1.7	10 ± 5.8	0.01 ± 0.015
GO:0032675	regulation of interleukin-6 production	4	1.9 ± 0.08	14 ± 5.9	43 ± 17.7	0.01 ± 0.014
GO:0030449	regulation of complement activation	4	-1.8 ± 0.07	42 ± 23.6	67 ± 40.9	0.02 ± 0.013
GO:0002521	leukocyte differentiation	4	1.5 ± 0.09	36 ± 13.9	122 ± 35.4	0.02 ± 0.017
GO:0046649	lymphocyte activation	4	1.5 ± 0.11	36 ± 13.4	123 ± 34	0.01 ± 0.008

## Sheet: Supplementary File 3b
Supplementary File 3b. Parent terms used to identify immune-associated Gene Ontology terms. Any term that is a descendent of any of these terms was identified as an immune term.
GO ID	Description
GO:0002376	Immune system process
GO:0002682	Regulation of immune system processes
GO:0002764	Immune response regulating signaling pathway
GO:0001816	Cytokine production
GO:0019221	Cytokine mediated signaling pathway
GO:0006952	Defense response
GO:0031347	Regulation of defense response
GO:0070661	Leukocyte proliferation
