# Supplementary material for: Extensive age-dependent loss of antibody diversity in naturally short-lived turquoise killifish
Source: eLife. 2022 Feb 7;11:e65117. doi: 10.7554/eLife.65117 (PMC8880994; doi:10.7554/eLife.65117)
Supplement: Supplementary file 4. — (a) Master-mix components for reverse transcription reaction used in library preparation protocol (per sample). (b) Overall PCR thermocycler protocol for library preparation protocol (see (c) for missing parameter values). (c) Specific PCR protocols used for different stages of Nothobranchius furzeri immunoglobulin sequencing library preparation protocol (see (d) for overall thermocycler protocol and Supplemental (d) for cycle numbers). See Supplementary file 5a for sequence information. If the number of samples to be sequenced was small, all volumes of PCR three were doubled for a 50 μl total PCR volume. The stated volumes apply separately to both forward and reverse primers for each reaction. All primers were diluted to and stored at an initial concentration of 10 μM. See Supplemental (d) for specific cycle numbers used in each experiment. (d) PCR cycle numbers during N. furzeri IgSeq library preparation protocol (b–c). (e) Bead cleanups during N. furzeri IgSeq library preparation protocol. Each bead cleanup takes place immediately after its corresponding stage. Bead volumes are usually given as multiples of the sample volume. All elutions performed in the specified volume of elution buffer (10 mM Tris-HCl, pH 8.5). If the PCR three reaction volume differed from 25 μl, bead and elution volumes were rescaled proportionally to sample volume as appropriate. In each experiment, samples were pooled in equimolar ratio, so the input volume depended on the number of samples and the concentration of the libraries. [file elife-65117-supp4.xlsx]

## Sheet: Supplementary File 4a
Supplementary File 4a. Master-mix components for reverse transcription reaction used in library preparation protocol (per sample).
Volume (μl)	Component	Initial concentration
2	SMARTScribe reverse transcriptase	100 U μl-1
3	SMARTScribe first-strand buffer	5×
2	SmartNNNa barcoded TSA	10 μM
2	DTT	20 mM
2	dNTP mix	10 μM per nucleotide
0.5	RNasin RNase inhibitor	40 U μl-1

## Sheet: Supplementary File 4b
Supplementary File 4b. Overall PCR thermocycler protocol for library preparation protocol (see Supplementary File 4c for missing parameter values).
Step	Temperature (℃)	Duration (s)	# Cycles
Initial denaturation	95	180	1
Denaturation	98	20	nc (see Supplementary File 4c)
Annealing	Ta (see Supplementary File 4c)	15
Extension	72	text (see Supplementary File 4c)
Final extension	72	text × 4 (see Supplementary File 4c)	1

## Sheet: Supplementary File 4c
Supplementary File 4c. Specific PCR protocols used for different stages of N. furzeri immunoglobulin sequencing library preparation protocol (see Supplementary File 4b for overall thermocycler protocol and Supplemental Supplementary File 4d for cycle numbers).
PCR Step	Protocol details			Primersa		Volumes (μl)b
	# cycles	Ta (℃)	text (s)	F	R	Template	Primersc	Kapa	H2O
1	18	65	15	IGHC-B	M1SS	10.5	1 (2×)	12.5	0
2	13	65	15	M1S+P2	IGHC-C+P1	1	0.5 (2×)	12.5	10.5
3	8 to 12d	68	15	P2	P1	2	0.75 (2×)	12.5	9
a See Supplementary File 5a for sequence information.
b If the number of samples to be sequenced was small, all volumes of PCR 3 were doubled for a 50μl total PCR volume.
c The stated volumes apply separately to both forward and reverse primers for each reaction. All primers were diluted to and stored at an initial concentration of 10 μM.
d See Supplementary File 4d for specific cycle numbers used in each experiment.

## Sheet: Supplementary File 4d
Supplementary File 4d. PCR cycle numbers during N. furzeri IgSeq library preparation protocol (Supplementary File 4b-c).
Experiment	Number of PCR cycles
	PCR 1	PCR 2	PCR 3
Pilot experiment (Figure 1-figure supplement 1)	18	13	9
32-individual aging cohort	18	13	8
Intestinal RNA samples	18	13	12

## Sheet: Supplementary File 4e
Supplementary File 4e. Bead cleanups during N. furzeri IgSeq library preparation protocol.
Stagea	Sample volume (μl)	Beads volume (μl)		Elution volume (μl)c
		μl	×b
RT	21	14.7	0.7	16.5
PCR 1	25	17.5	0.7	25
PCR 2	25	17.5	0.7	15
PCR 3	25d	20d	0.8	15d
Pooling	Variese	Variese	2.5	35
a Each bead cleanup takes place immediately after its corresponding stage.
b Bead volumes are usually given as multiples of the sample volume.
c All elutions performed in the specified volume of elution buffer (10 mM Tris-HCl, pH 8.5).
d If the PCR 3 reaction volume differed from 25 μl, bead and elution volumes were rescaled proportionally to sample volume as appropriate.
e In each experiment, samples were pooled in equimolar ratio, so the input volume depended on the number of samples and the concentration of the libraries.
