# Supplementary material for: Extensive age-dependent loss of antibody diversity in naturally short-lived turquoise killifish
Source: eLife. 2022 Feb 7;11:e65117. doi: 10.7554/eLife.65117 (PMC8880994; doi:10.7554/eLife.65117)
Supplement: Supplementary file 5. — (a) Primers and oligonucleotides used in Nothobranchius furzeri IgSeq library preparation protocol. See Appendix 1—figure 2 for more information about the structure of the template-switch adapter. For each P2 oligo (D701-D712), the N characters are replaced by the appropriate Illumina i7 index sequence from (c). For each P1 oligo (D501-D508), the highlighted N characters are replaced by the appropriate Illumina i5 index sequence from (d). The template-switch adapter and primer sequences homologous to it (M1SS and M1S) were provided by Turchaninova et al., 2016, while those homologous to constant-region exons (GSP, IGH-B, and IGH-C) were designed using Primer3 (Untergasser et al., 2012). (b) i5 index sequences. (c) i7 index sequences. [file elife-65117-supp5.xlsx]

## Sheet: Supplementary File 5a
Supplementary File 5a. Primers and oligonucleotides used in N. furzeri IgSeq library preparation protocol.
Name	Sequence	Purpose
SmartNNNa	AAGCAGUGGTAUCAACGCAGAGUNNNNUNNNNUNNNNUCTTrGrGrGrG	Template-switch adapter
GSP	TGGTCTTGCCAGCTGGTGATTTCCGCC	Cμ2-specific reverse-transcription primer
M1SS	AAGCAGTGGTATCAACGCA	PCR1 forward primer
IGH-B	CCACATGGCACCAGAGGAAAC	PCR1 reverse primer
M1S+P2	GTGACTGGAGTTCAGACGTGTGCTCTTCCGATCTCAGTGGTATCAACGCAGAG	PCR2 forward primer
IGH-C+P1	ACACTCTTTCCCTACACGACGCTCTTCCGATCTATGGCACCAGAGGAAACACAAC	PCR2 reverse primer
P2	ACAAGCAGAAGACGGCATACGAGATNNNNNNNNGTGACTGGAGTTCAGACGTGTGC	PCR3 forward primer
P1	AATGATACGGCGACCACCGAGATCTACACNNNNNNNNACACTCTTTCCCTACACGACGC	PCR3 reverse primer
	See Appendix 1-figure 2 for more information about the structure of the template-switch adapter.
	For each P2 oligo (D701-D712), the N characters are replaced by the appropriate Illumina i7 index sequence from Supplementary File 5c.
	For each P1 oligo (D501-D508), the highlighted N characters are replaced by the appropriate Illumina i5 index sequence from Supplementary File 5b.
	The template-switch adapter and primer sequences homologous to it (M1SS and M1S) were provided by Turchaninova et al. (Turchaninova et al. 2016), while those homologous to constant-region exons (GSP, IGH-B and IGH-C) were designed using Primer3 (Untergasser et al. 2012).

## Sheet: Supplementary File 5b
Supplemental Table 14. i5 index sequences.
Name	Index sequence
D501	AGGCTATA
D502	GCCTCTAT
D503	AGGATAGG
D504	TCAGAGCC
D505	CTTCGCCT
D506	TAAGATTA
D507	ACGTCCTG
D508	GTCAGTAC

## Sheet: Supplementary File 5c
Supplemental Table 15. i7 index sequences.
Name	Index sequence
D701	CGAGTAAT
D702	TCTCCGGA
D703	AATGAGCG
D704	GGAATCTC
D705	TTCTGAAT
D706	ACGAATTC
D707	AGCTTCAG
D708	GCGCATTA
D709	CATAGCCG
D710	TTCGCGGA
D711	GCGCGAGA
