# Supplementary figures and images for: Extensive age-dependent loss of antibody diversity in naturally short-lived turquoise killifish
Source: eLife journal article supplement (doi:10.7554/elife.65117), 2022-02-07

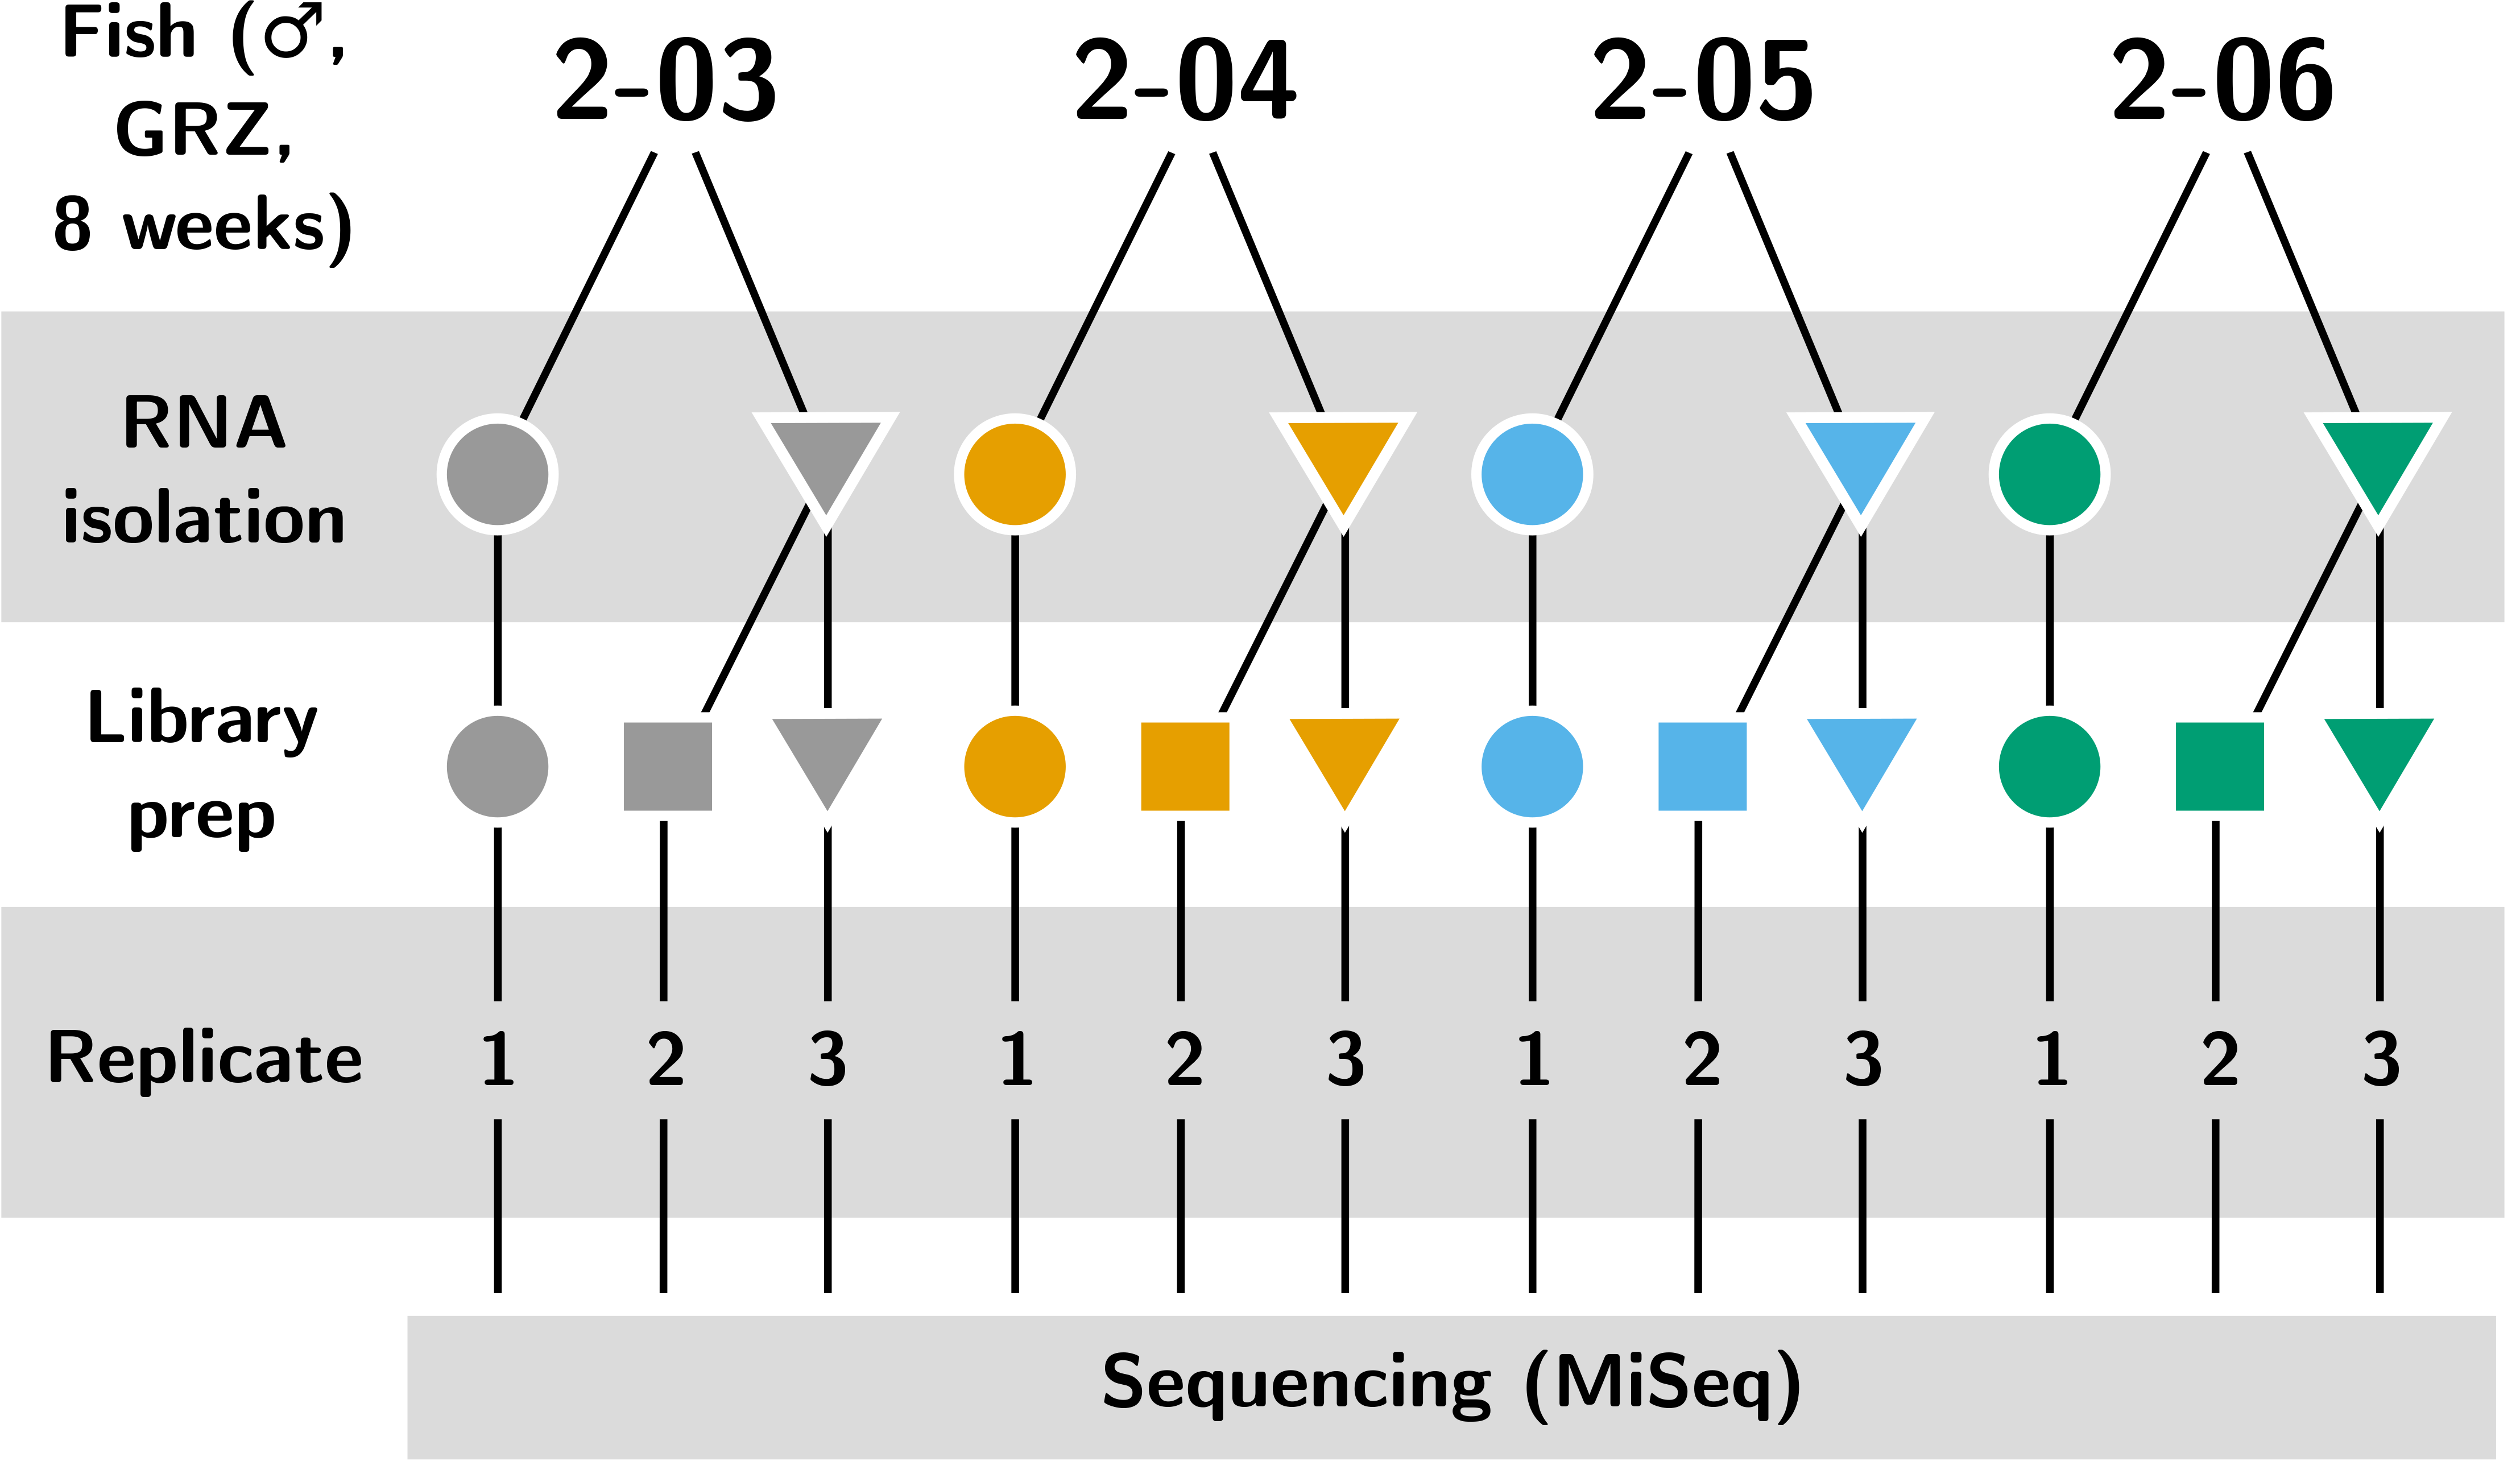

Supplement: supp [file elife-65117-supp-v1.zip › elife_poa_e65117_Figure_1_figure_supplement_1.png]

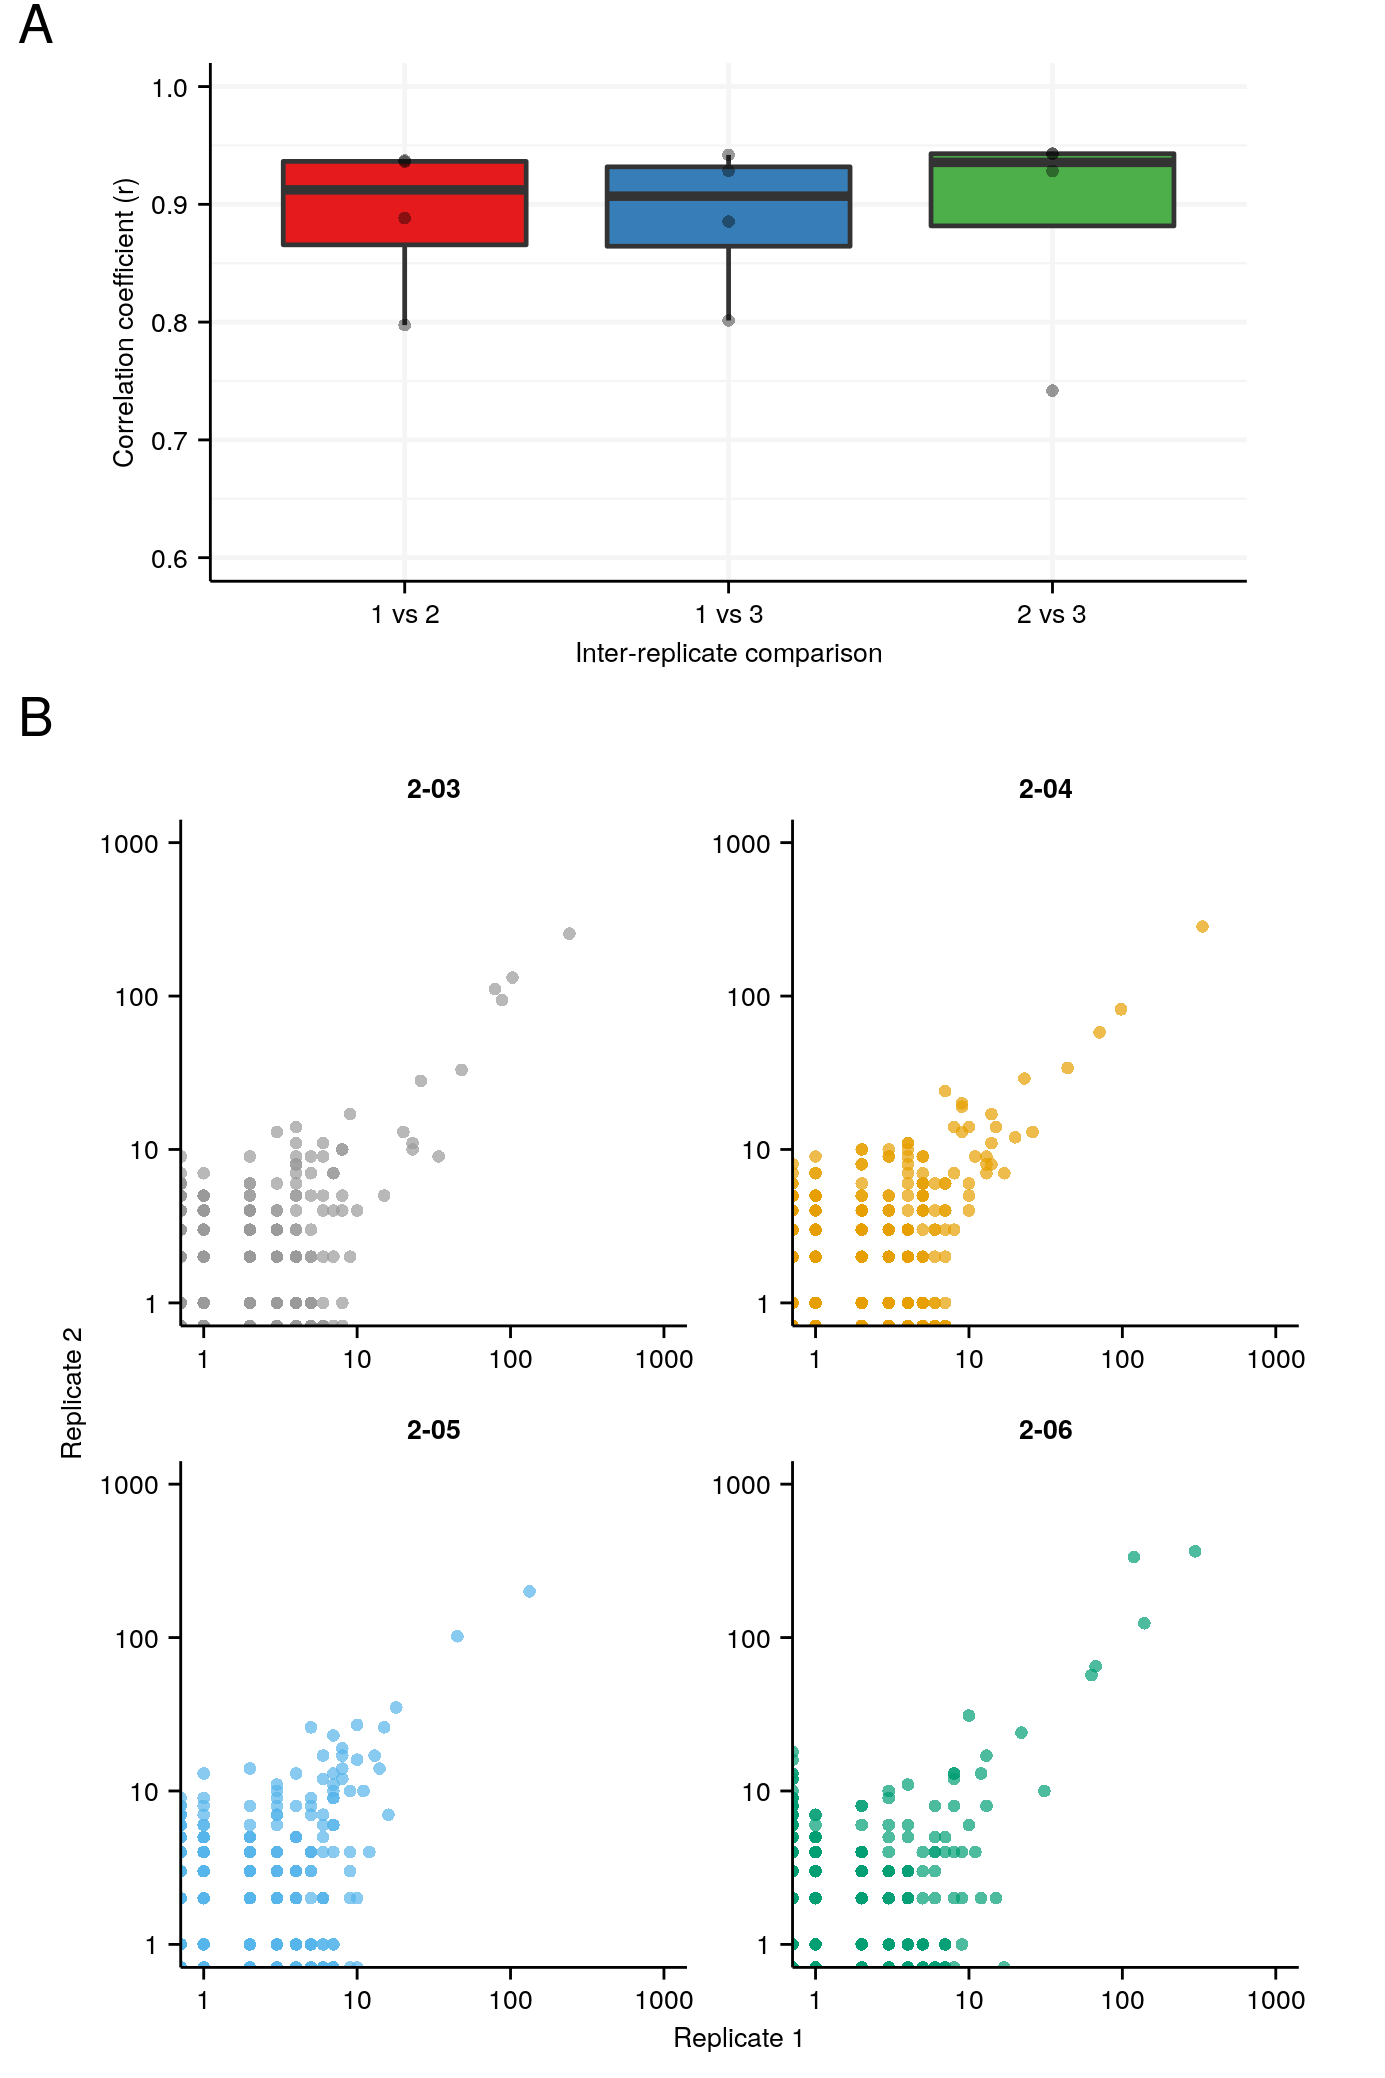

Supplement: supp [file elife-65117-supp-v1.zip › elife_poa_e65117_Figure_1_figure_supplement_2.png]

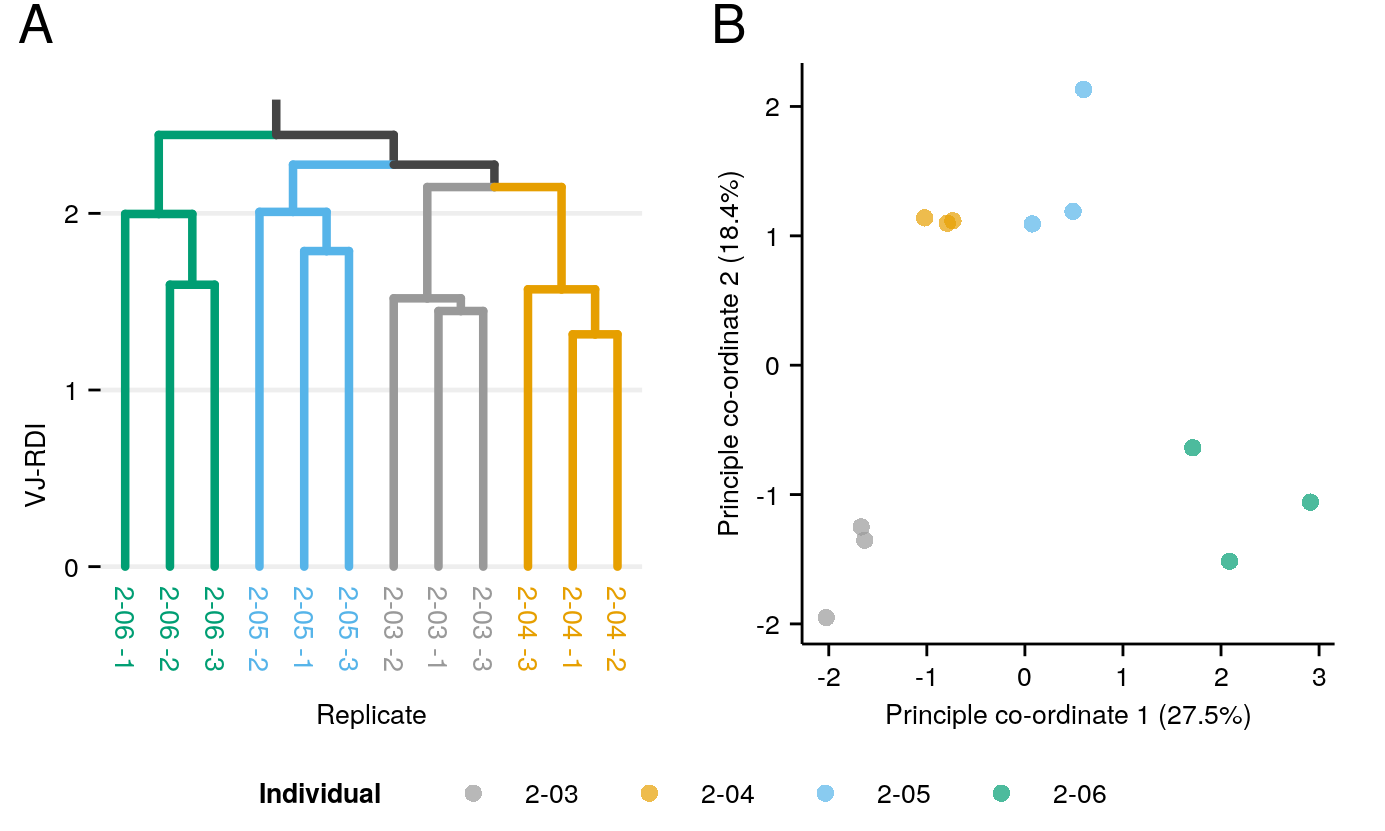

Supplement: supp [file elife-65117-supp-v1.zip › elife_poa_e65117_Figure_1_figure_supplement_3.png]

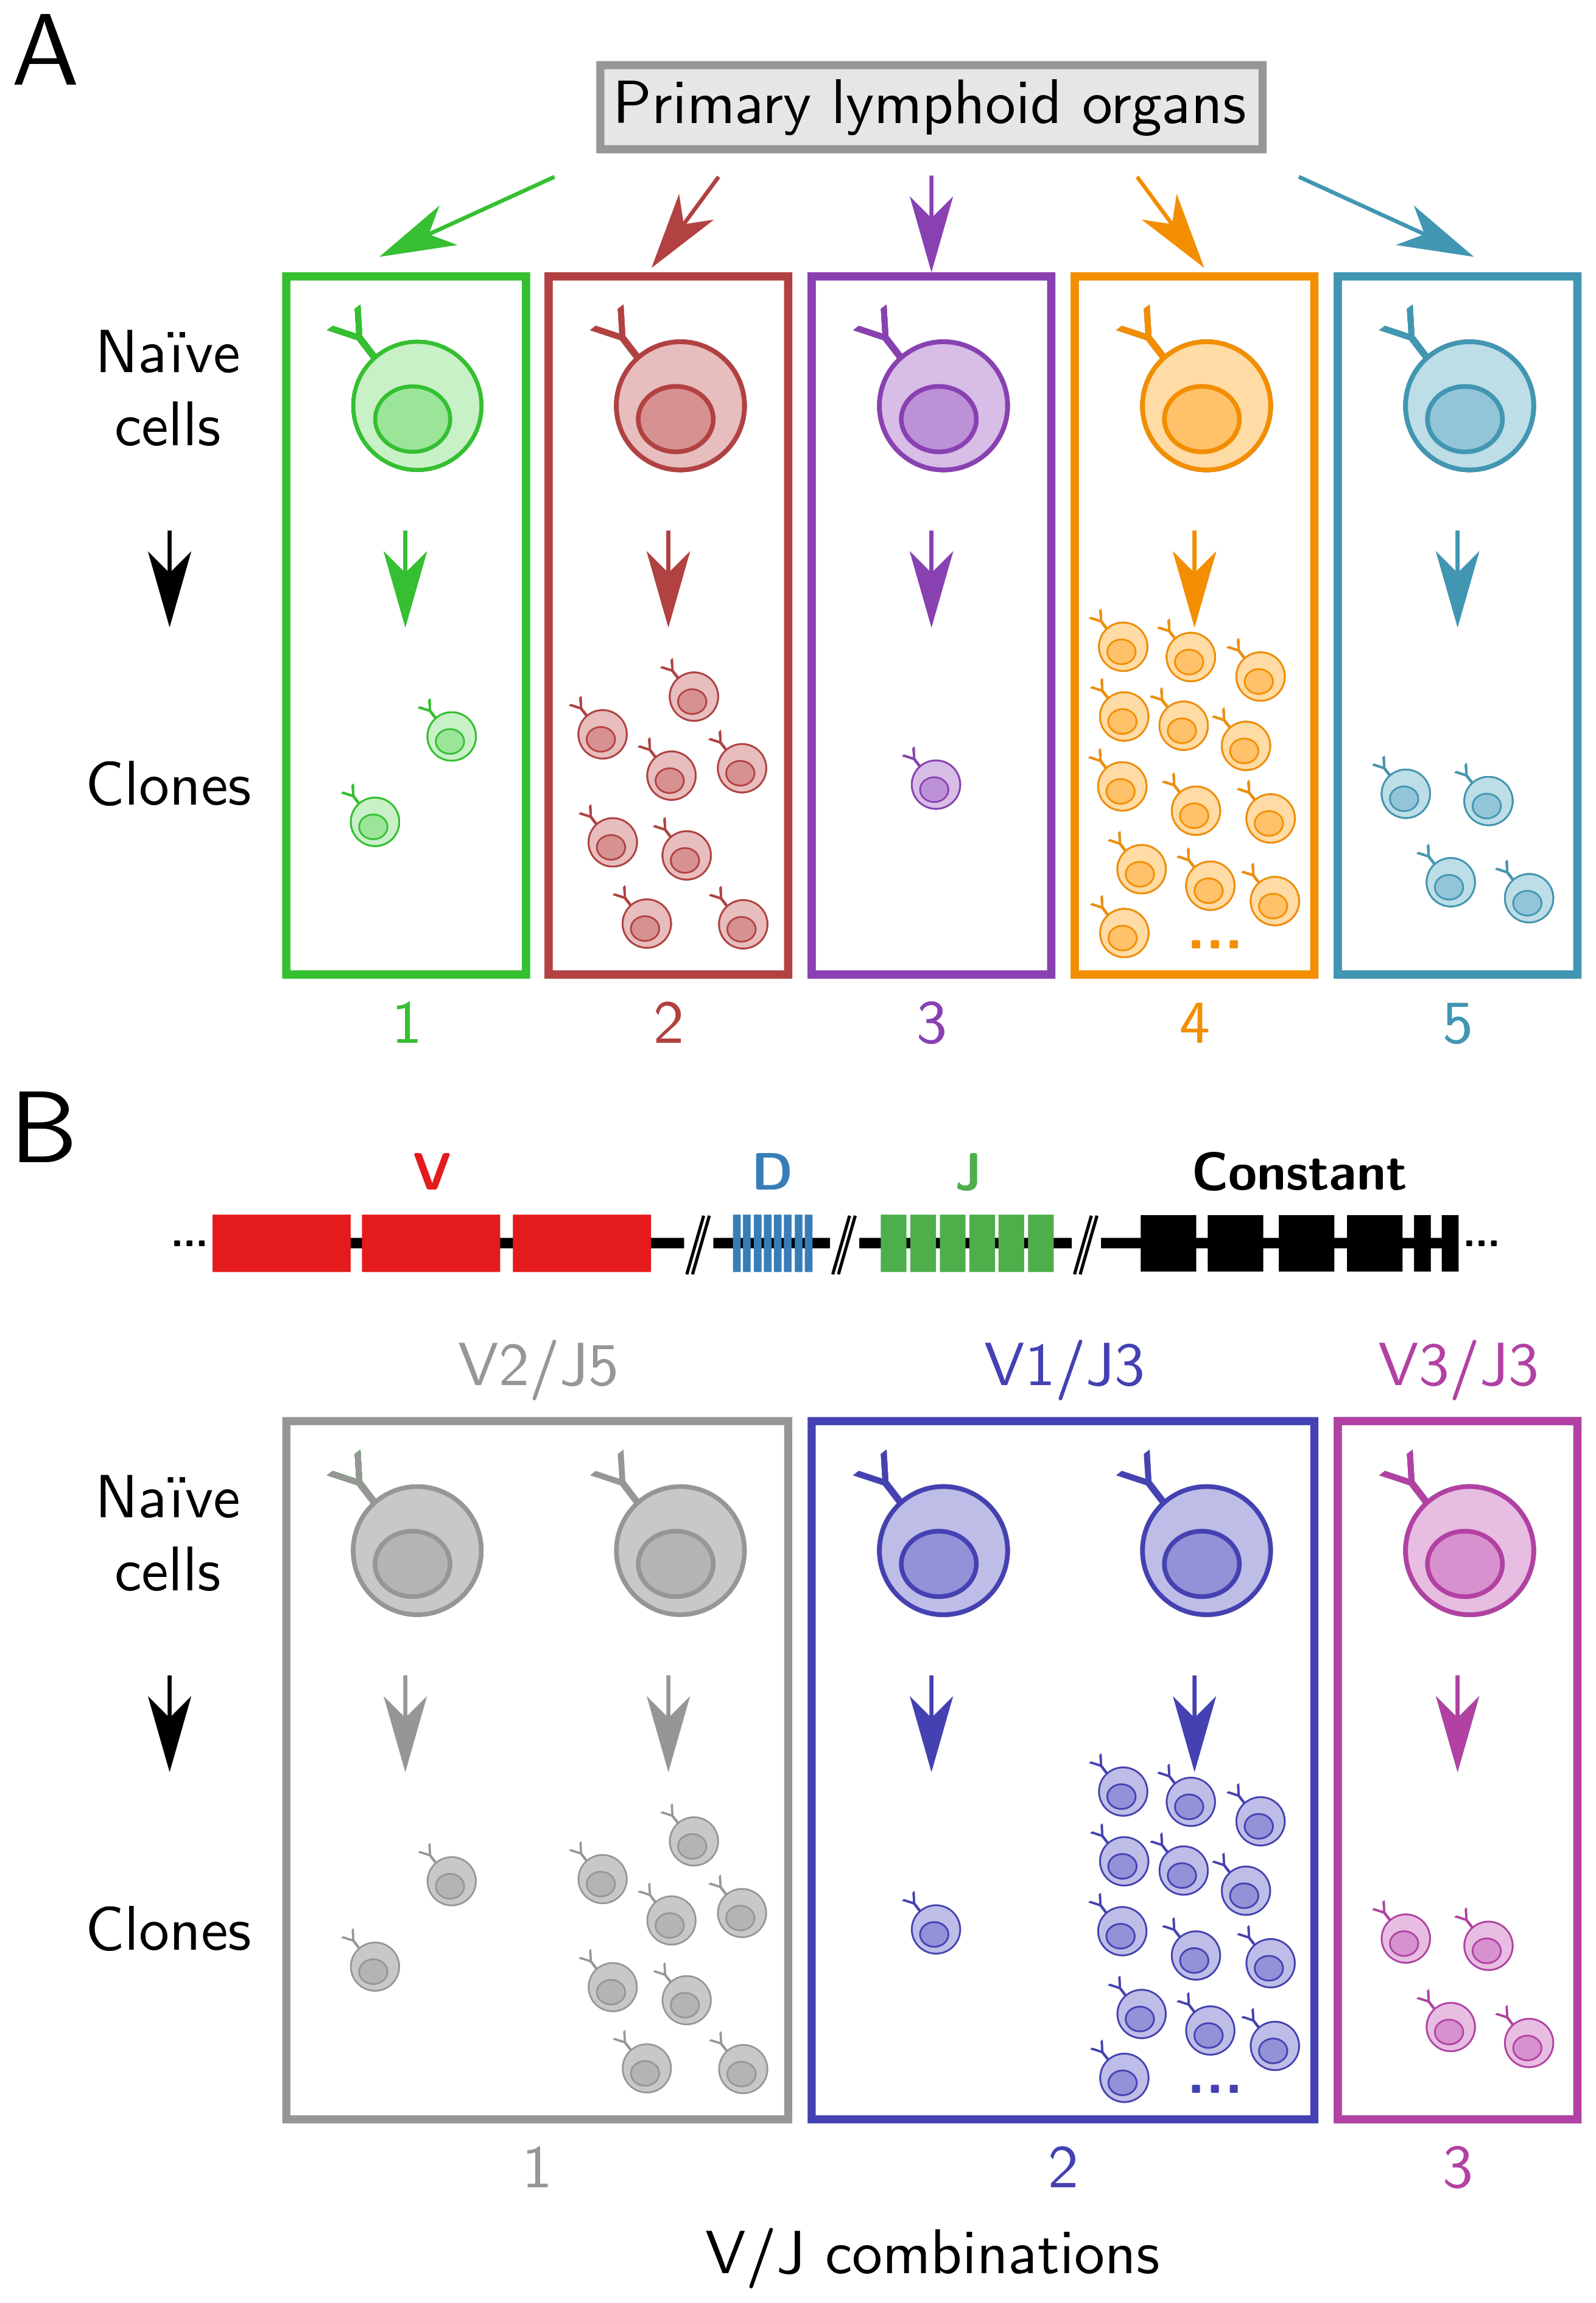

Supplement: supp [file elife-65117-supp-v1.zip › elife_poa_e65117_Figure_2_figure_supplement_1.png]

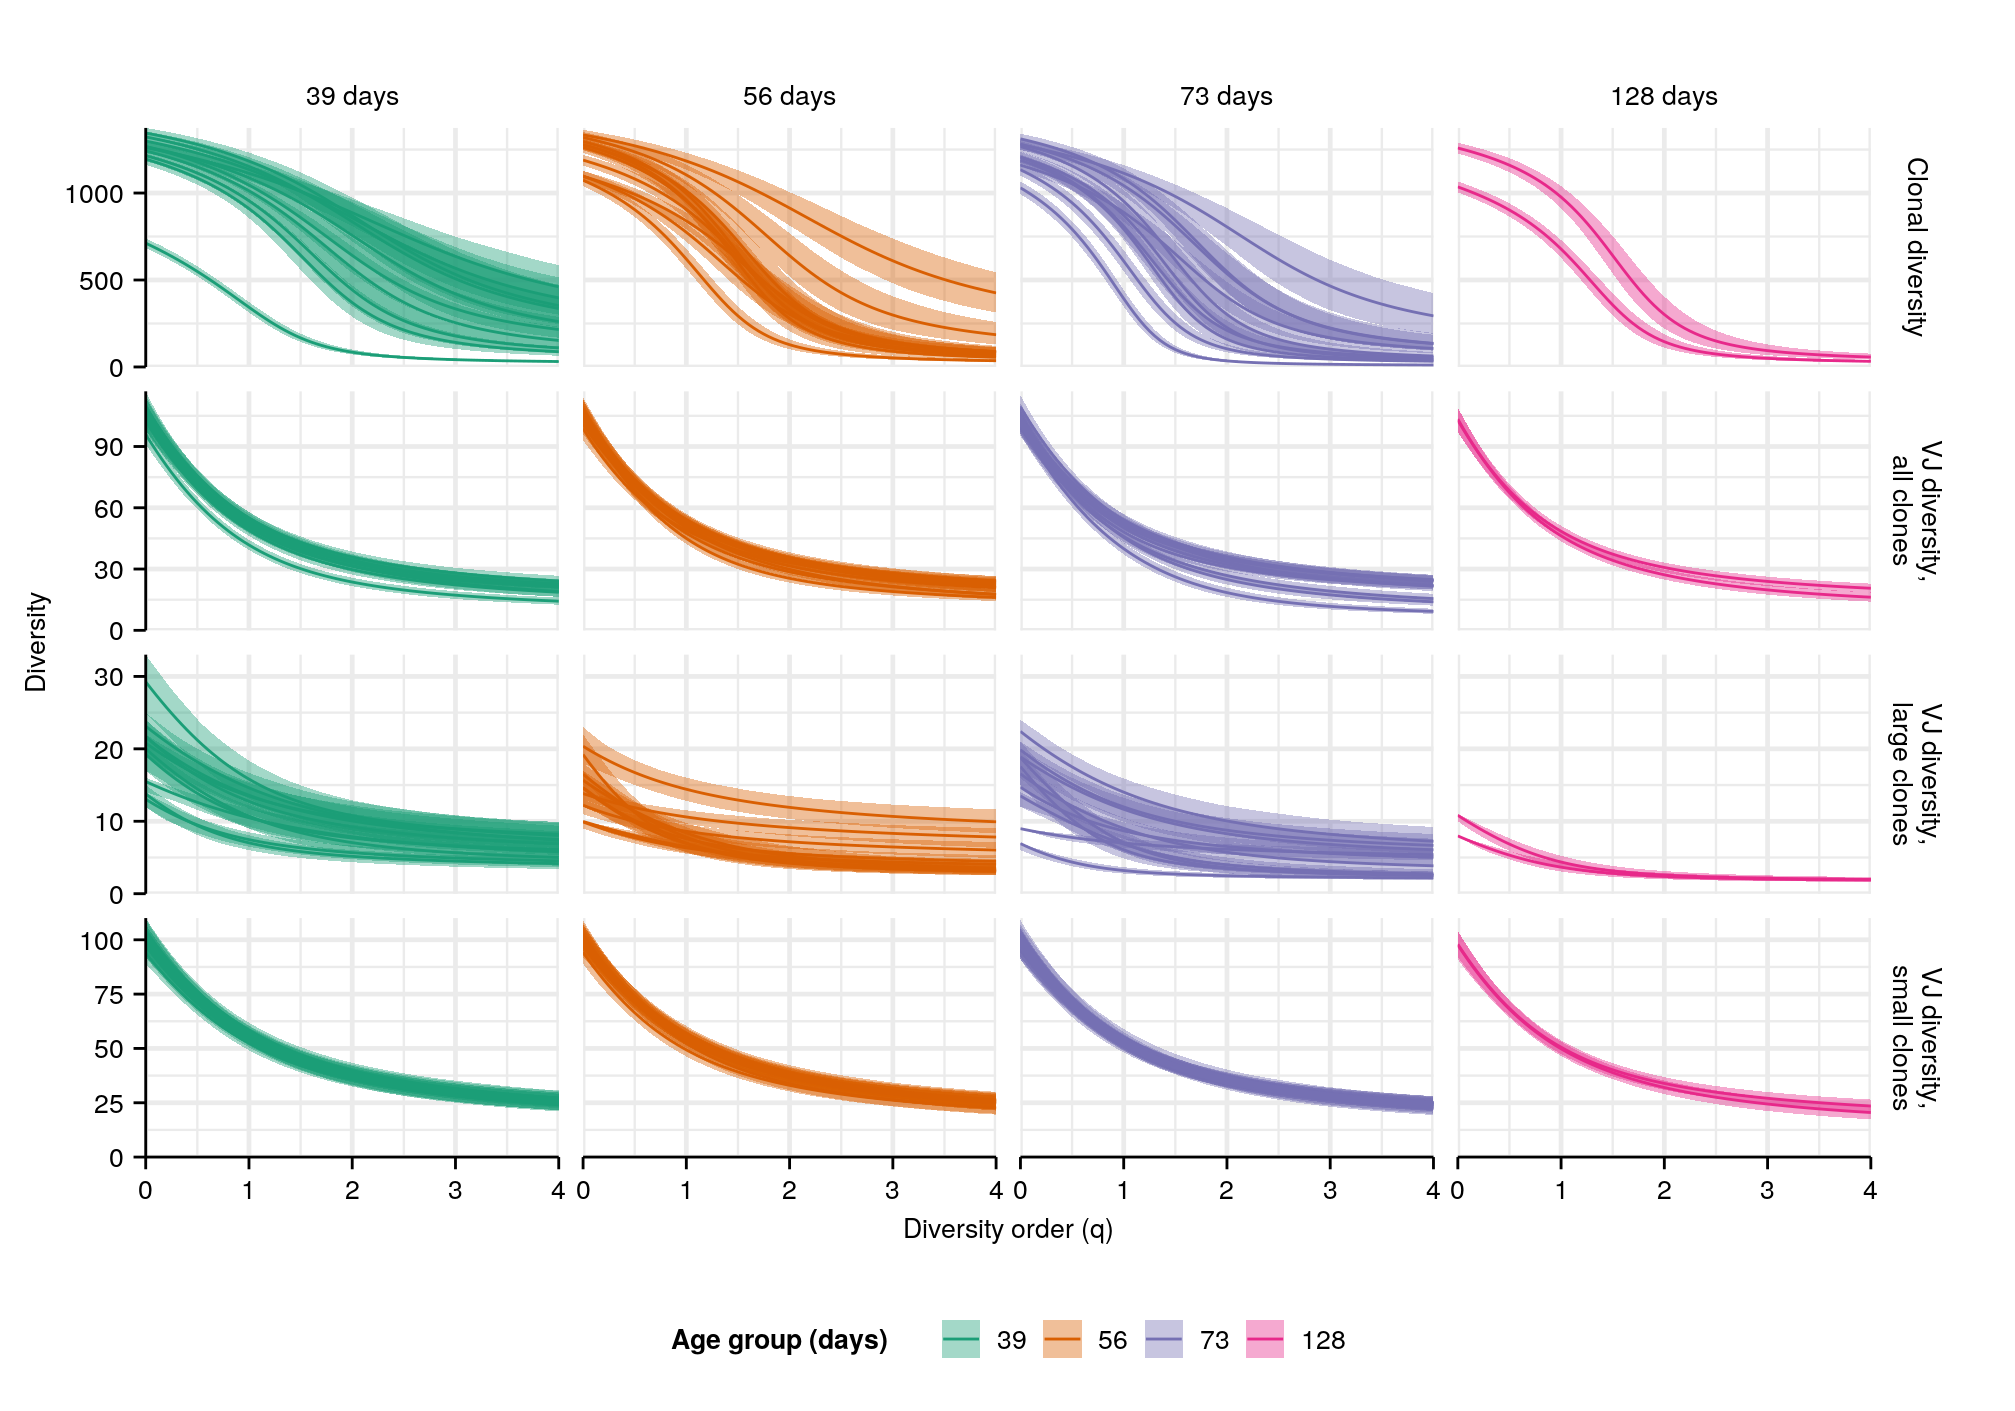

Supplement: supp [file elife-65117-supp-v1.zip › elife_poa_e65117_Figure_2_figure_supplement_2.png]

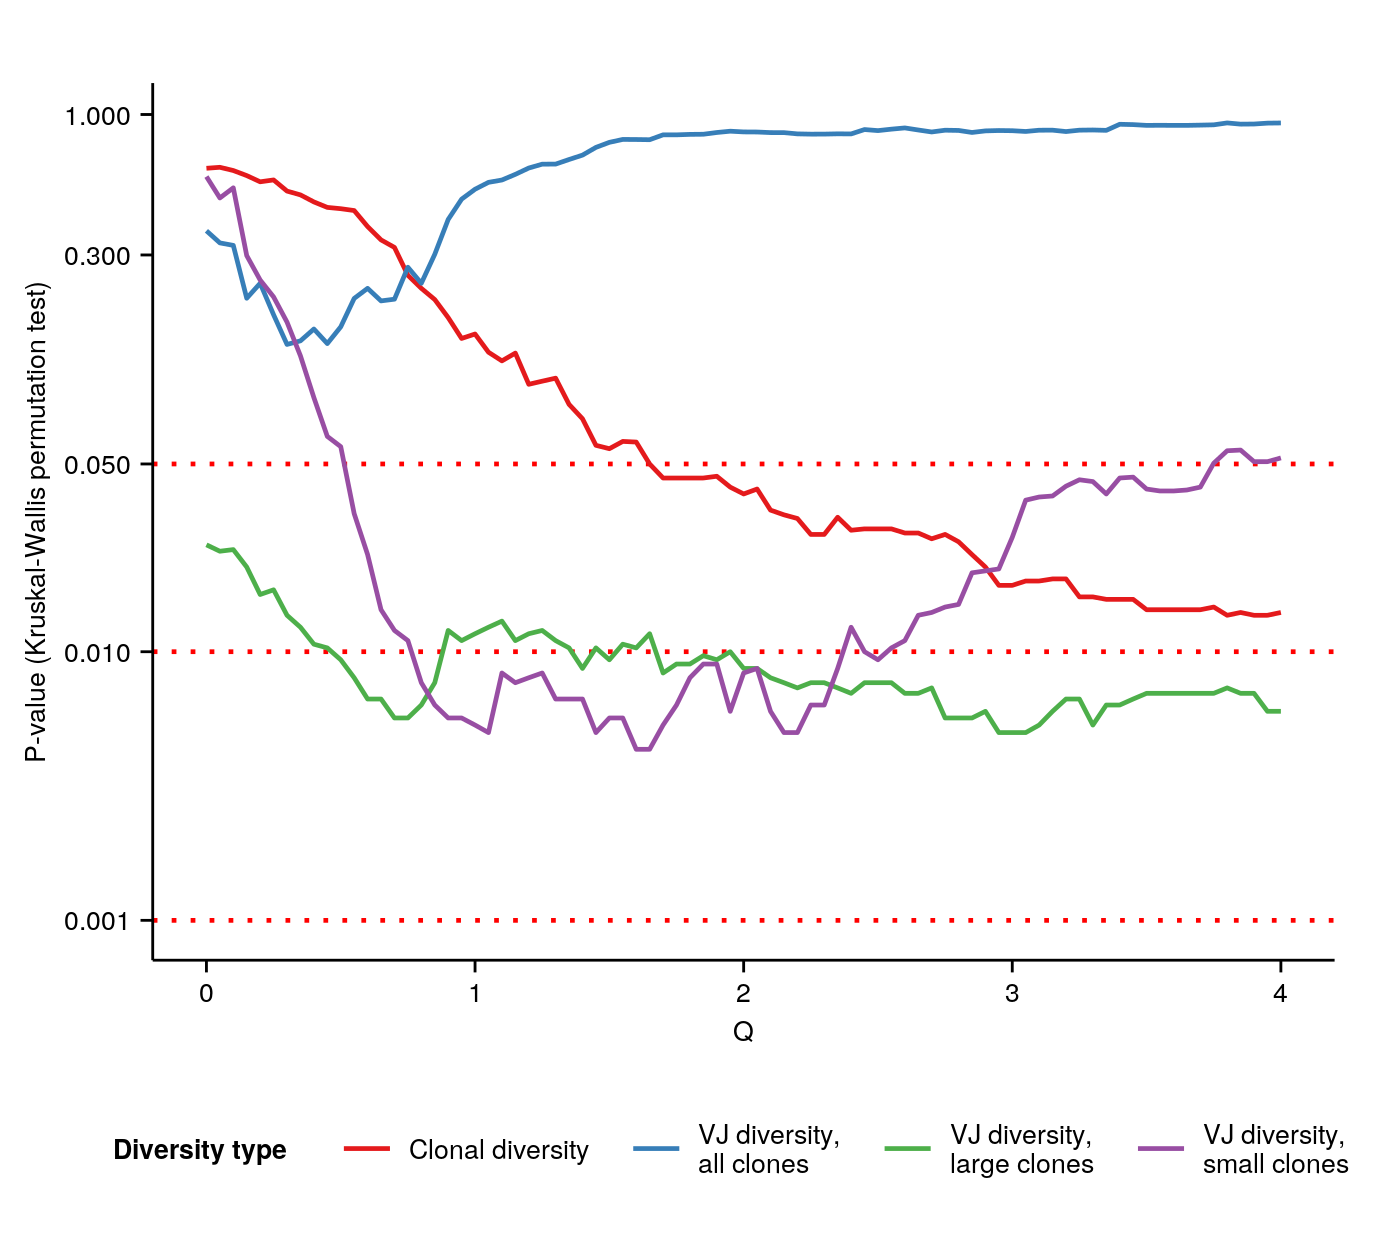

Supplement: supp [file elife-65117-supp-v1.zip › elife_poa_e65117_Figure_2_figure_supplement_3.png]

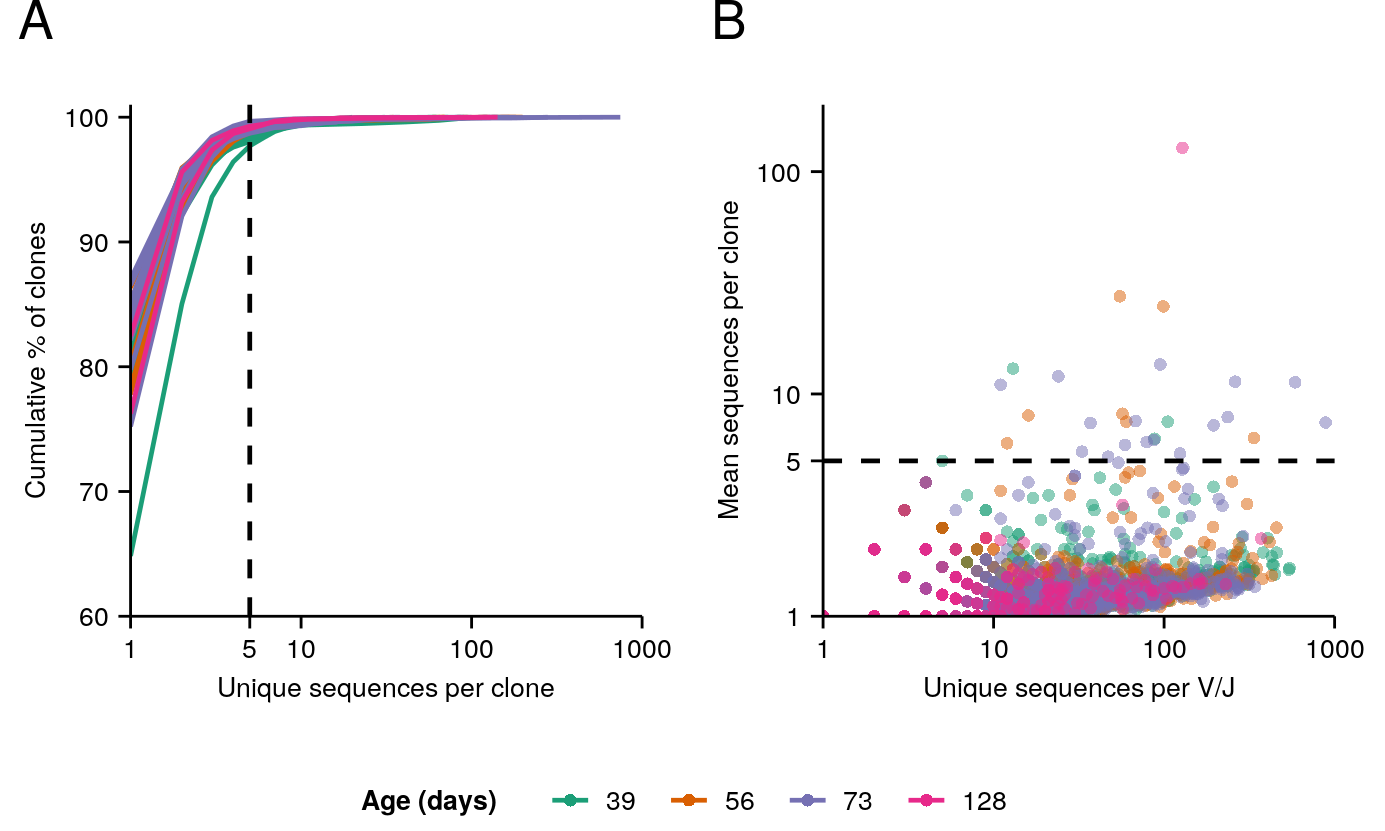

Supplement: supp [file elife-65117-supp-v1.zip › elife_poa_e65117_Figure_2_figure_supplement_4.png]

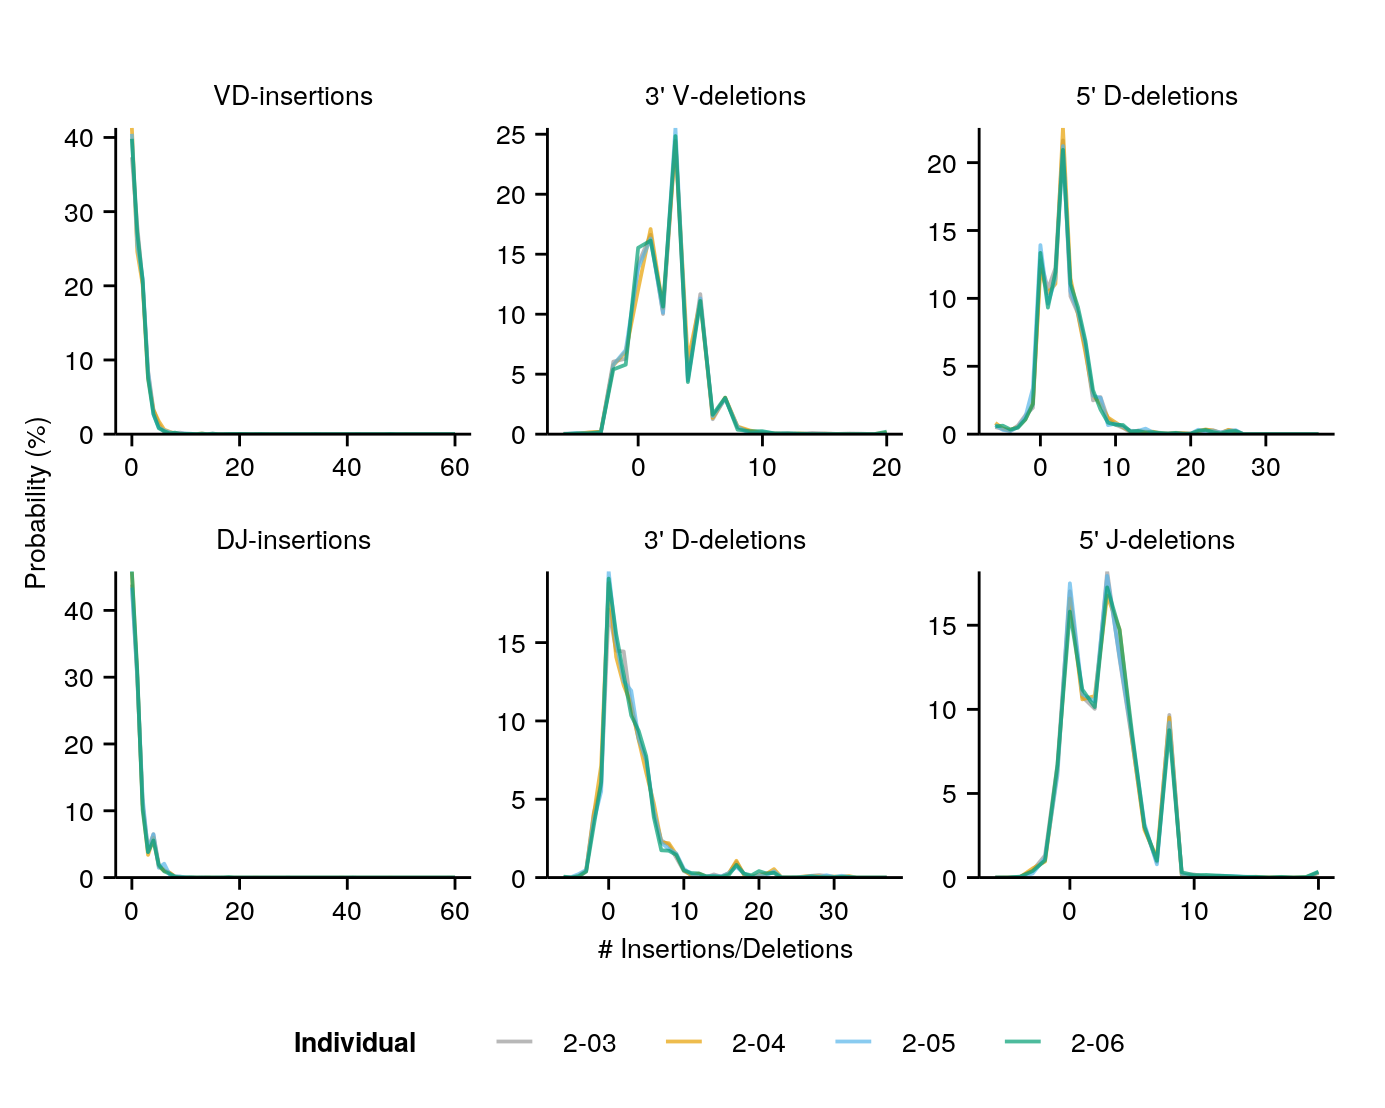

Supplement: supp [file elife-65117-supp-v1.zip › elife_poa_e65117_Figure_3_figure_supplement_1.png]

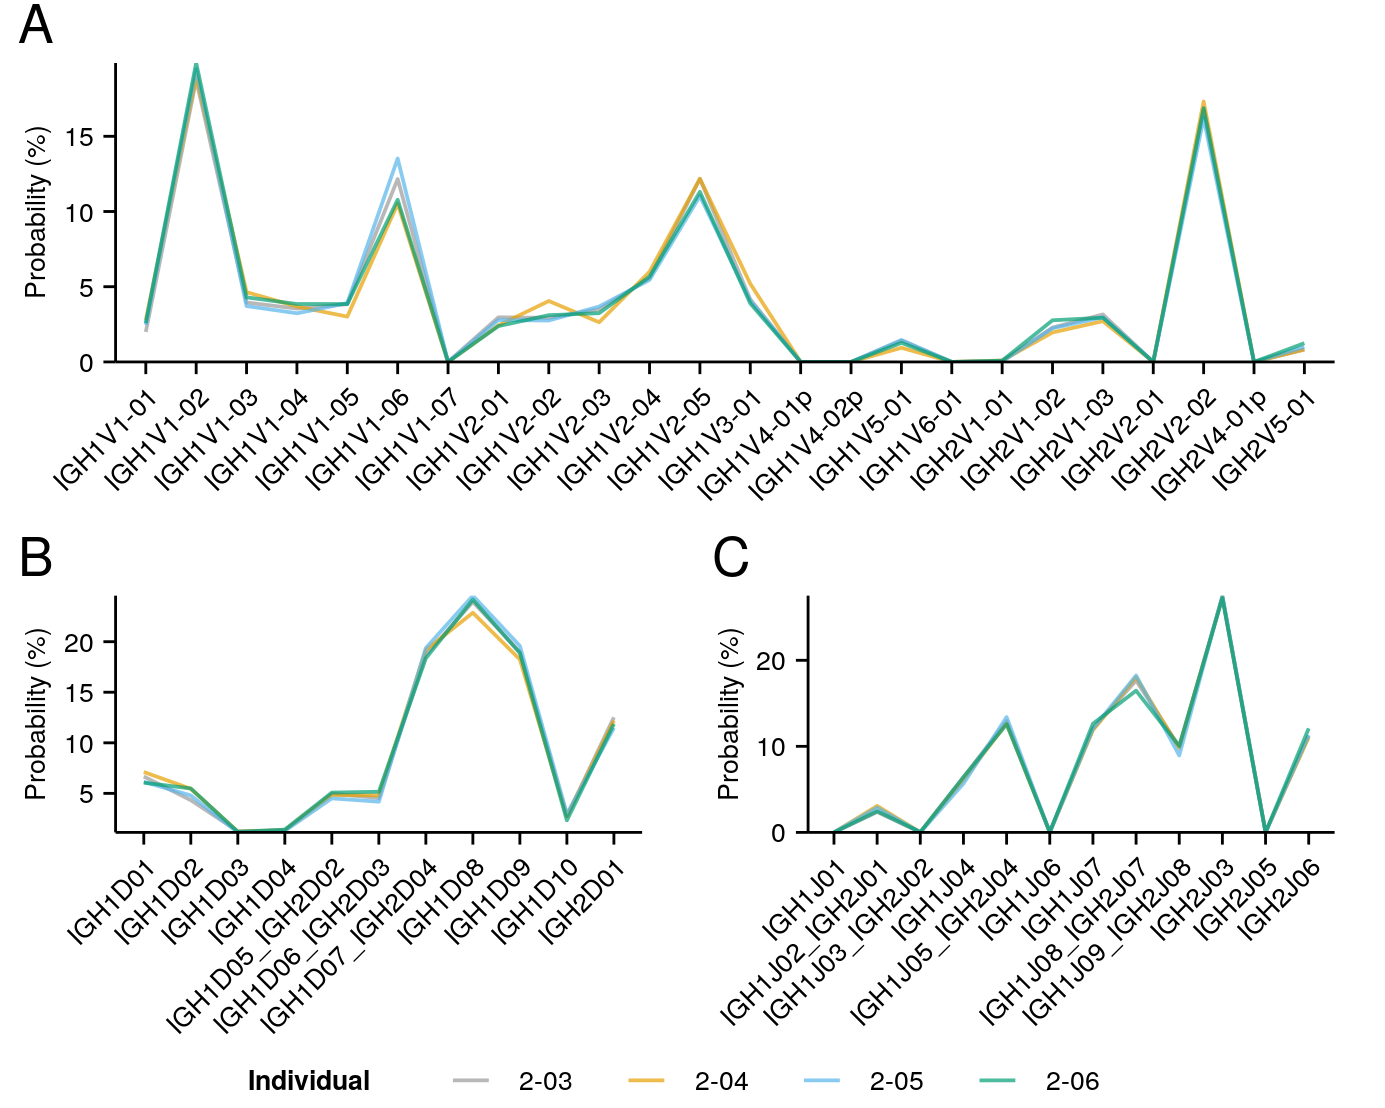

Supplement: supp [file elife-65117-supp-v1.zip › elife_poa_e65117_Figure_3_figure_supplement_2.png]

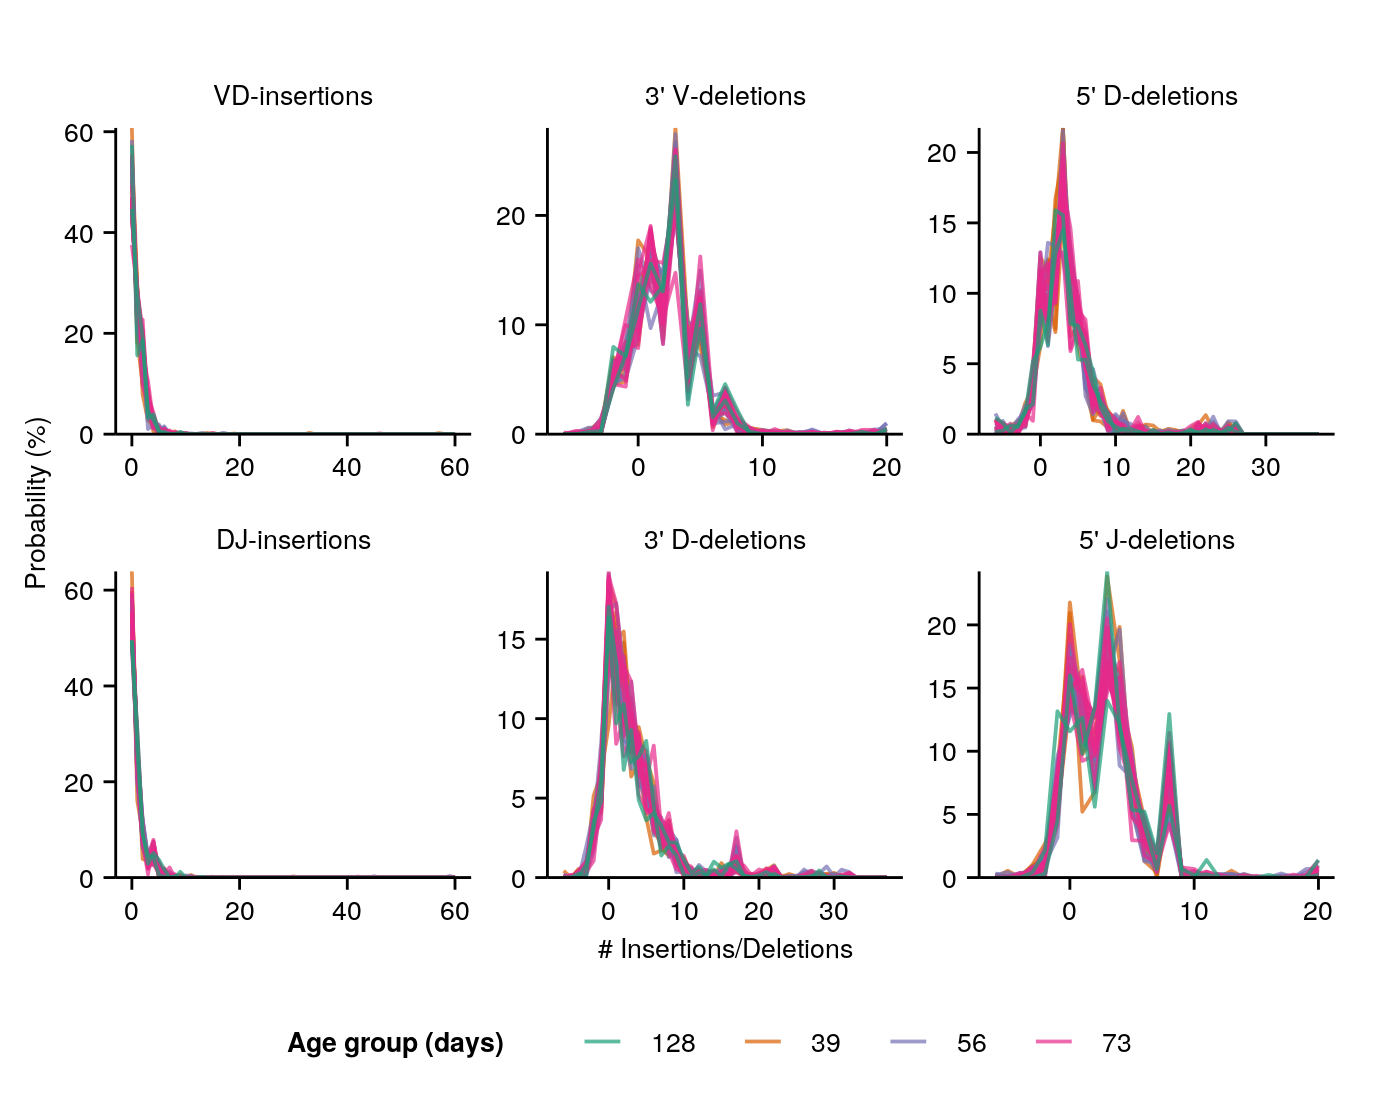

Supplement: supp [file elife-65117-supp-v1.zip › elife_poa_e65117_Figure_3_figure_supplement_3.png]

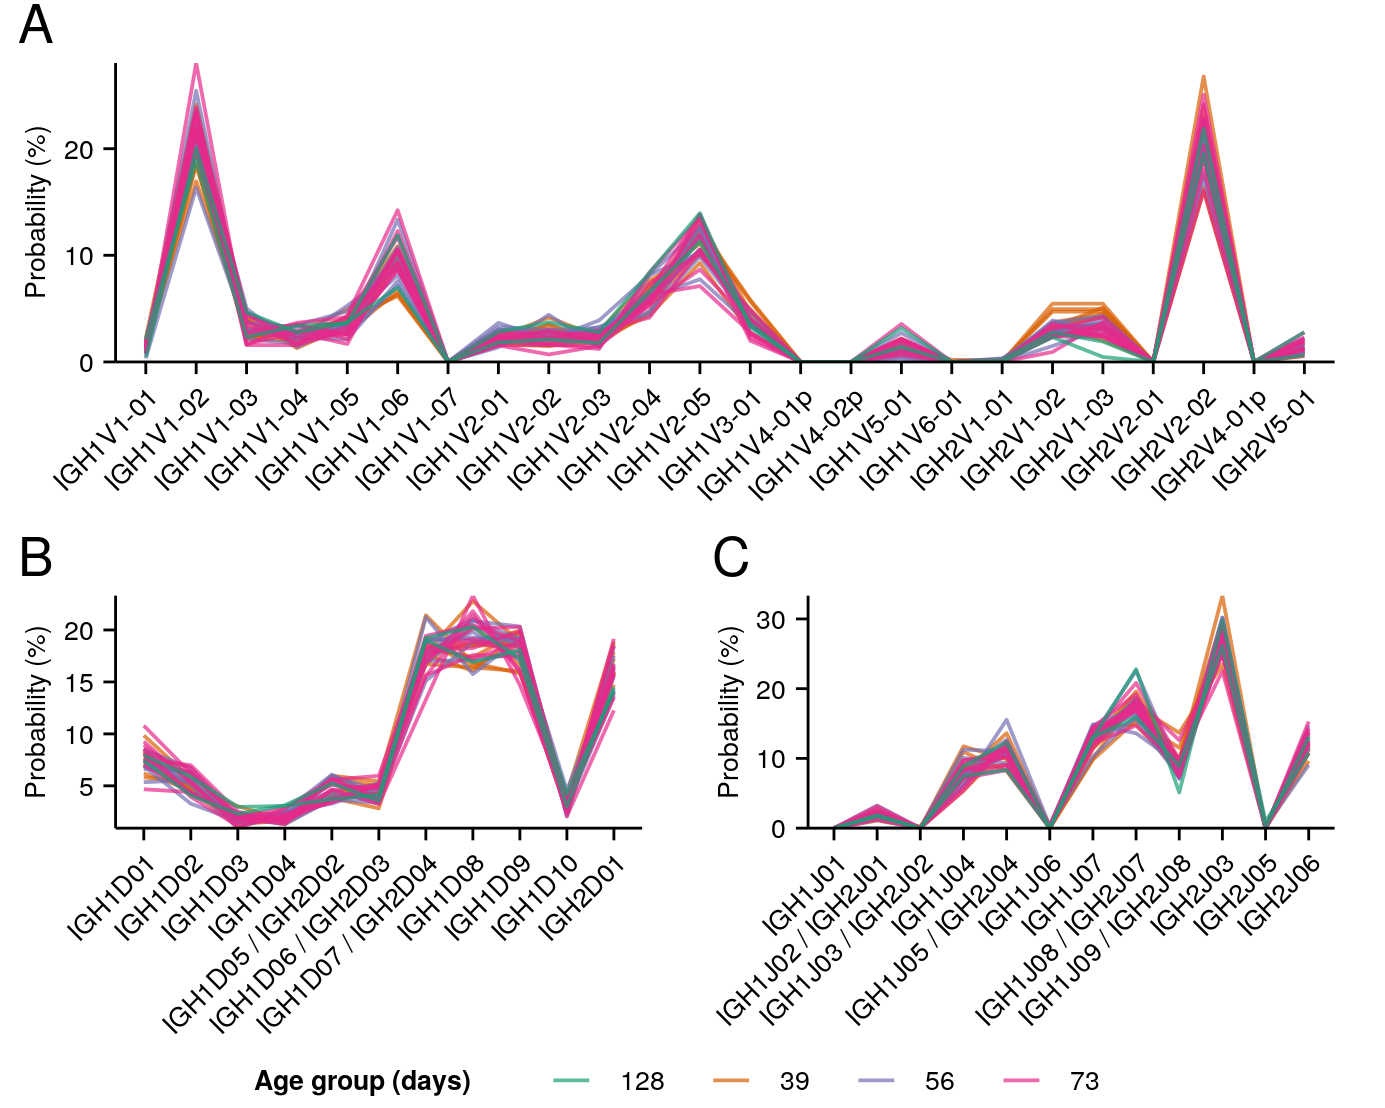

Supplement: supp [file elife-65117-supp-v1.zip › elife_poa_e65117_Figure_3_figure_supplement_4.png]

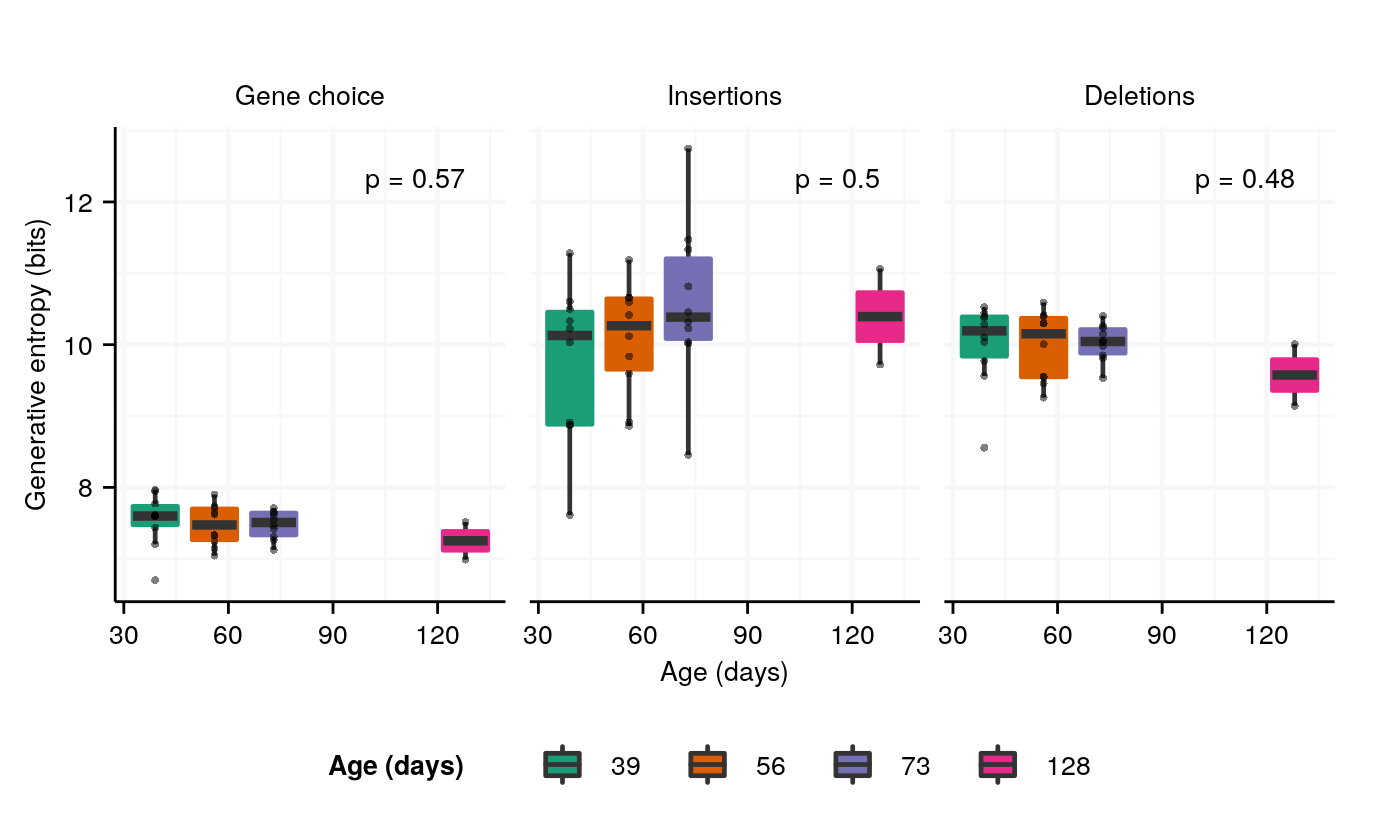

Supplement: supp [file elife-65117-supp-v1.zip › elife_poa_e65117_Figure_4_figure_supplement_5.png]

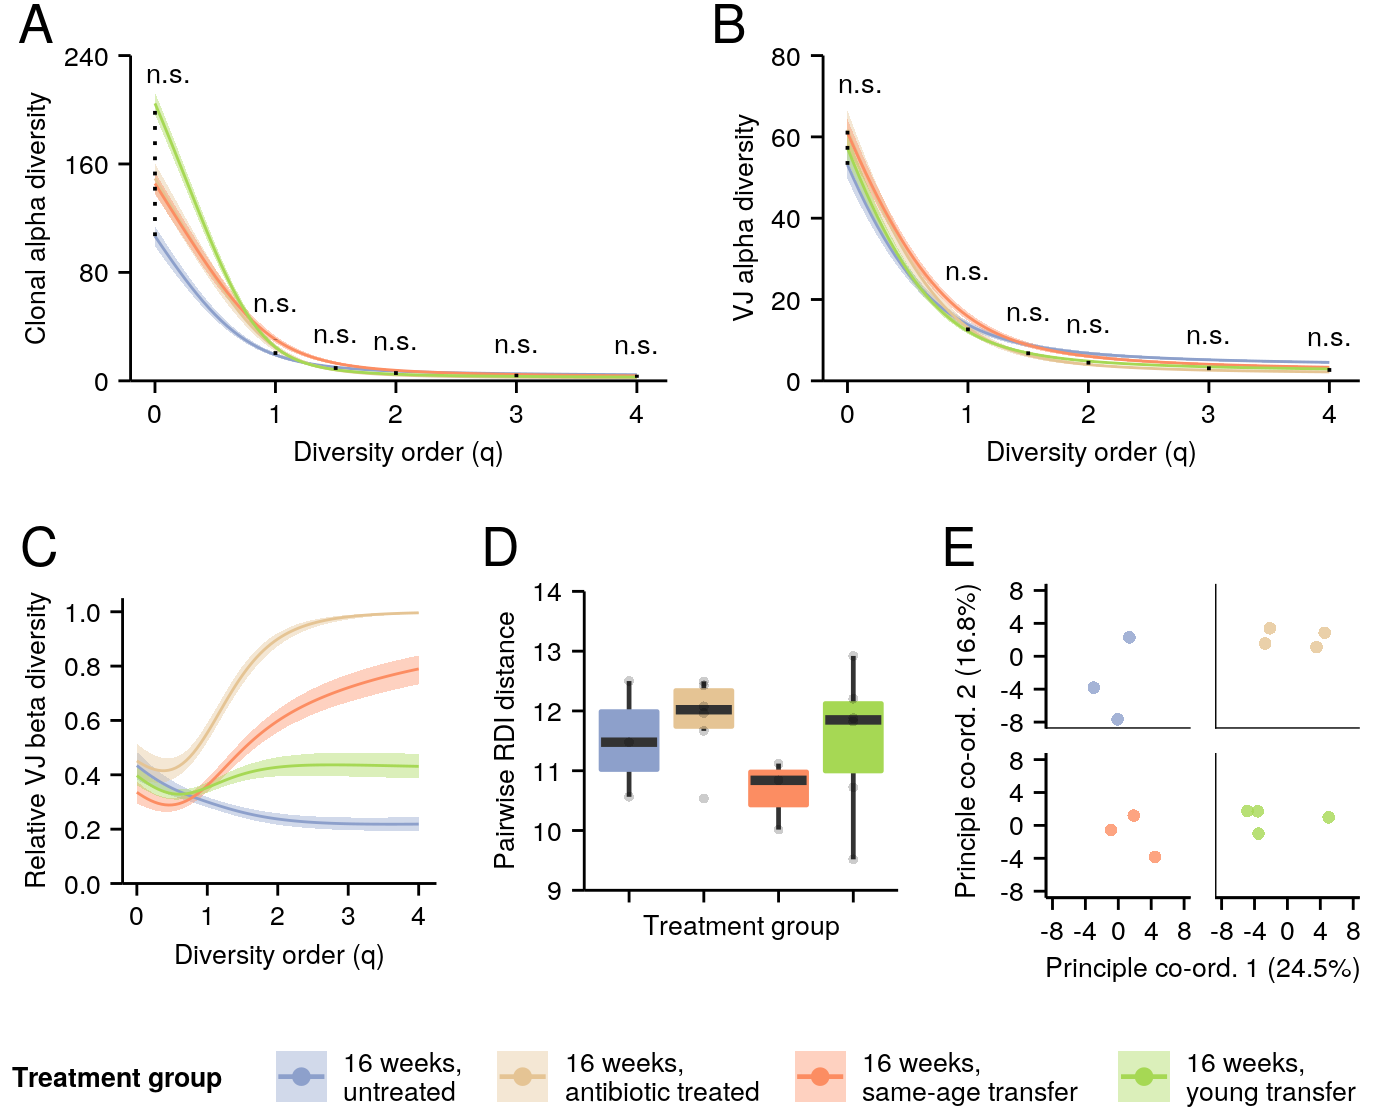

Supplement: supp [file elife-65117-supp-v1.zip › elife_poa_e65117_Figure_4_figure_supplement_1.png]

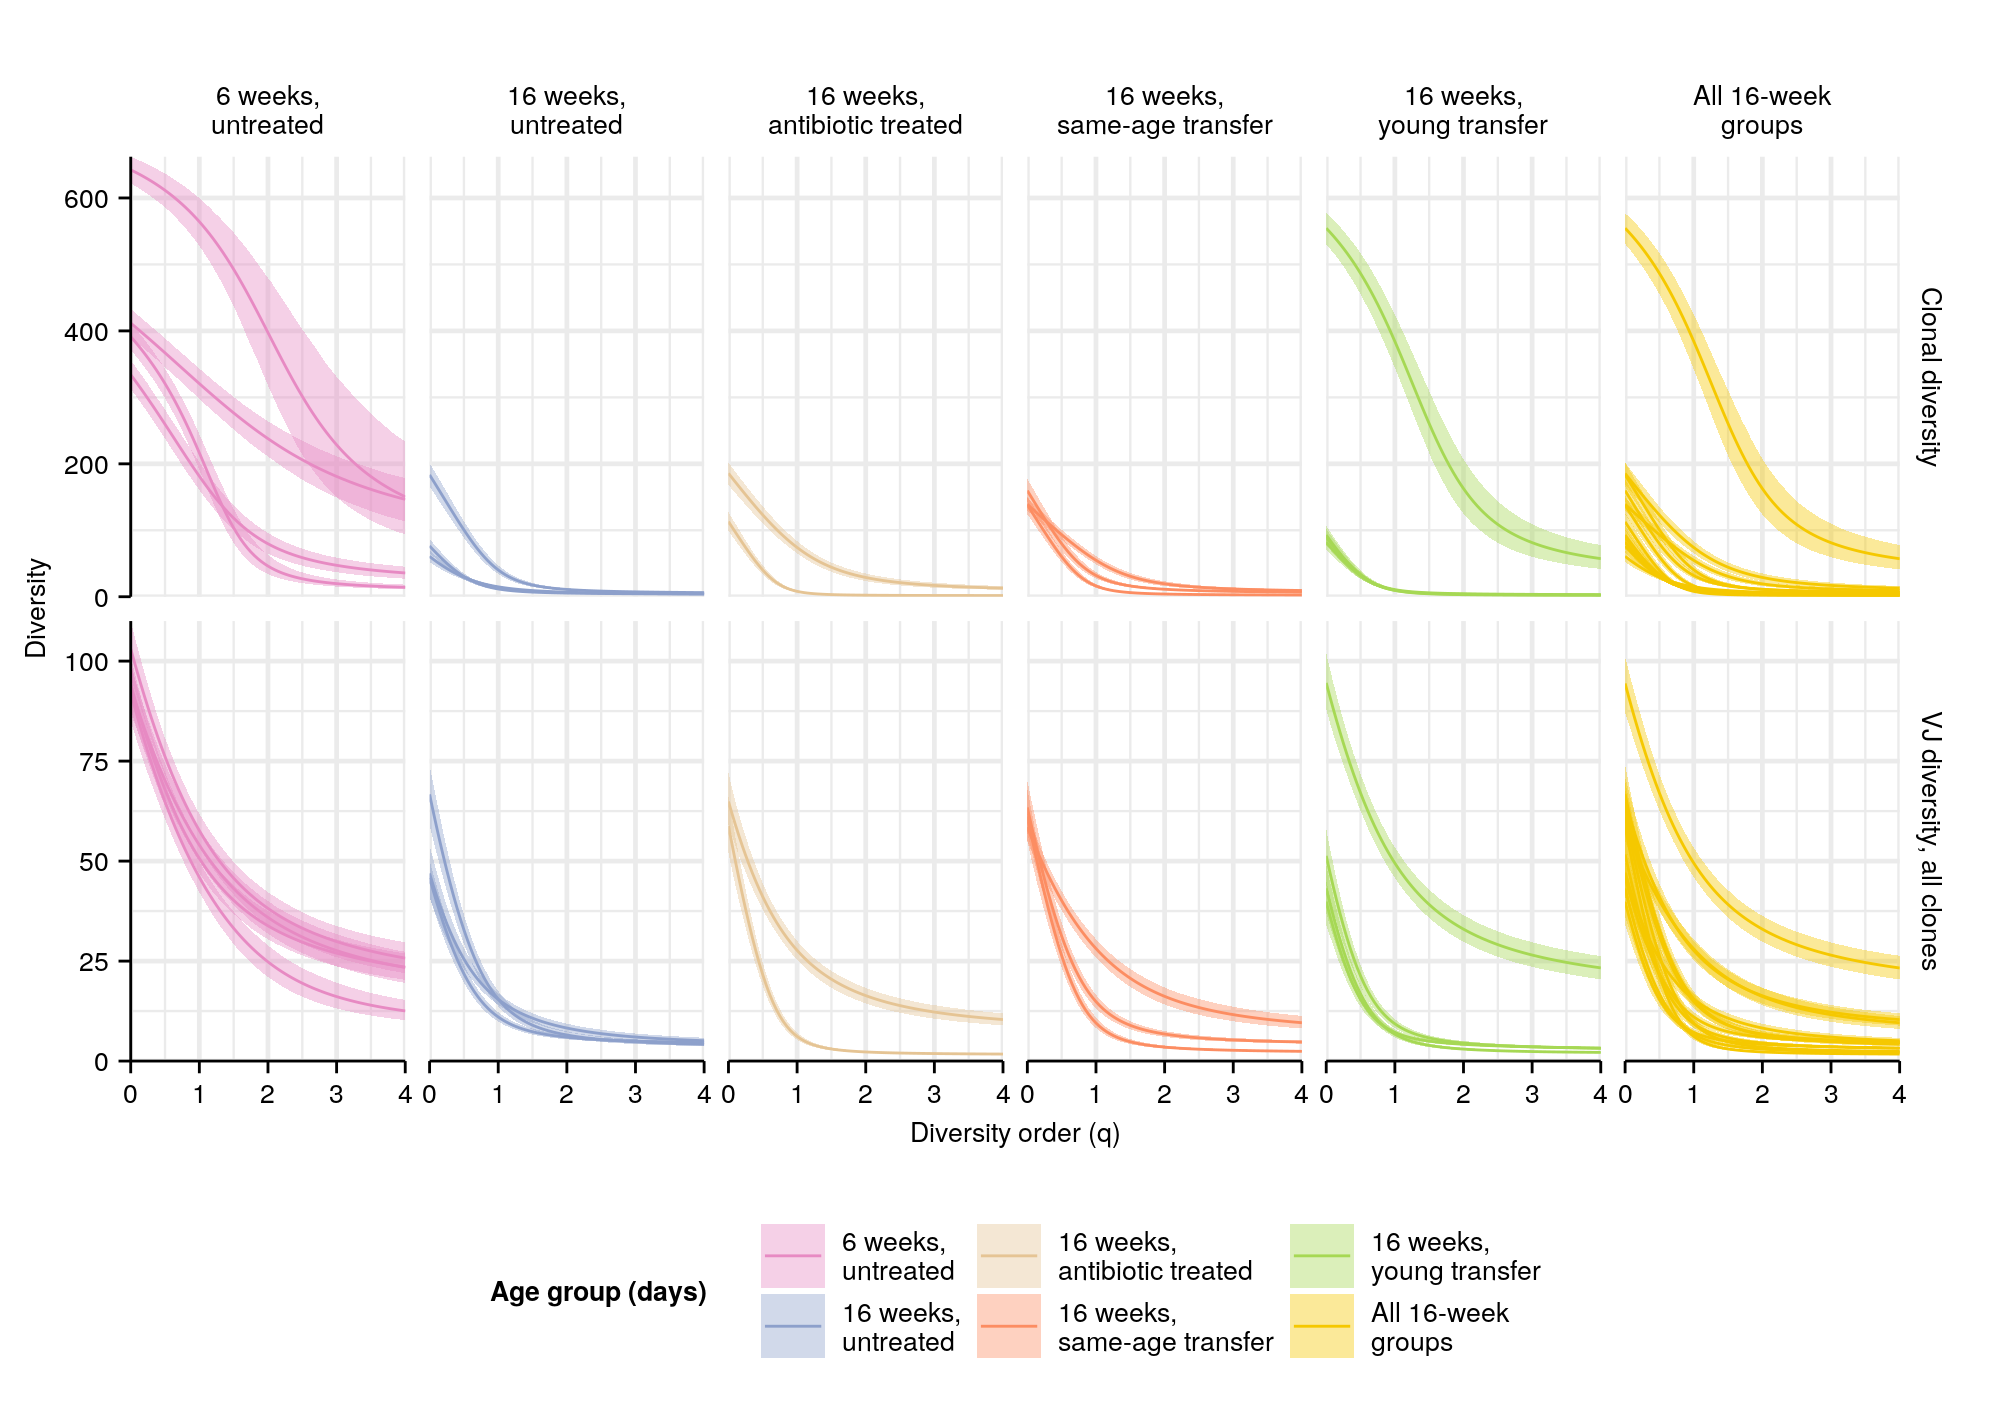

Supplement: supp [file elife-65117-supp-v1.zip › elife_poa_e65117_Figure_4_figure_supplement_2.png]

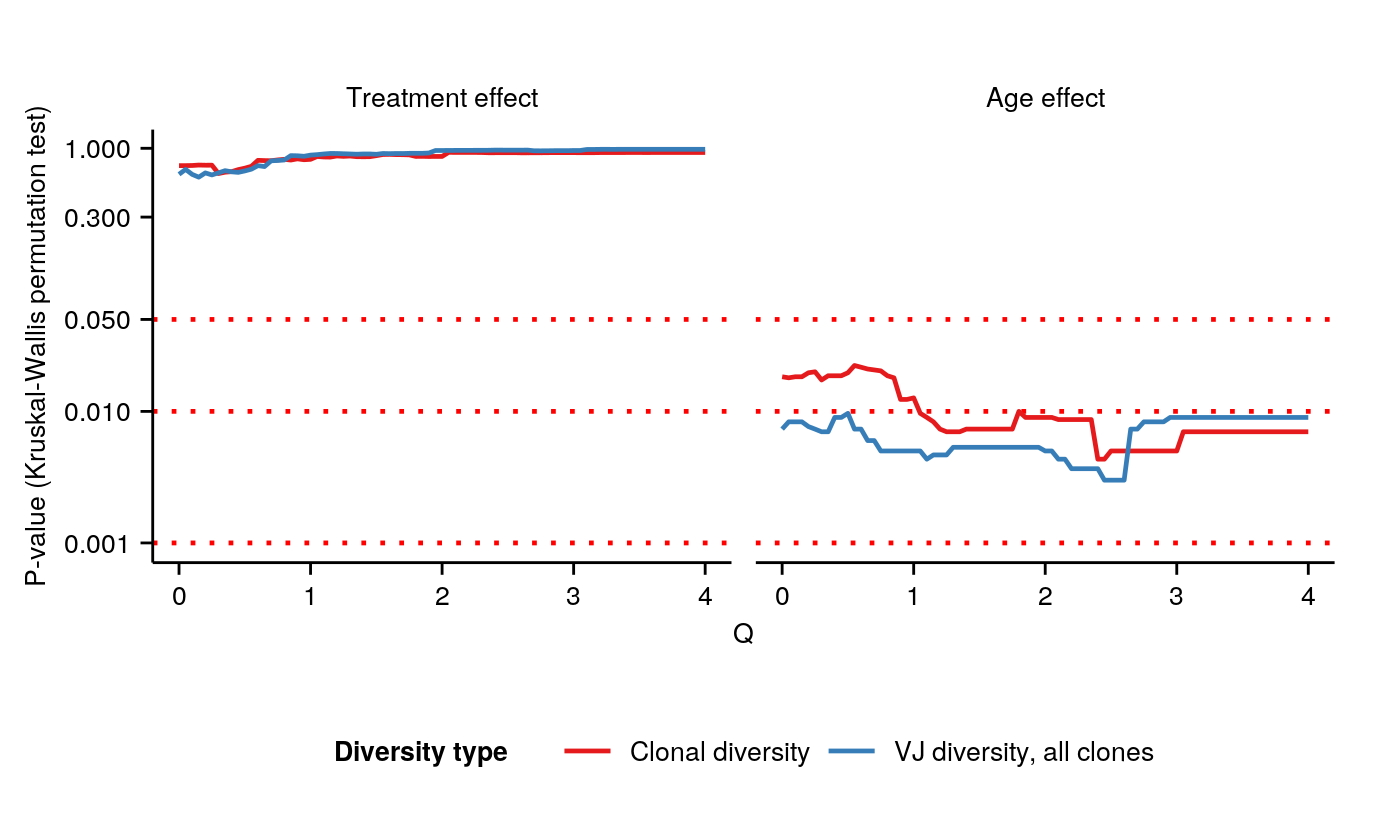

Supplement: supp [file elife-65117-supp-v1.zip › elife_poa_e65117_Figure_4_figure_supplement_3.png]

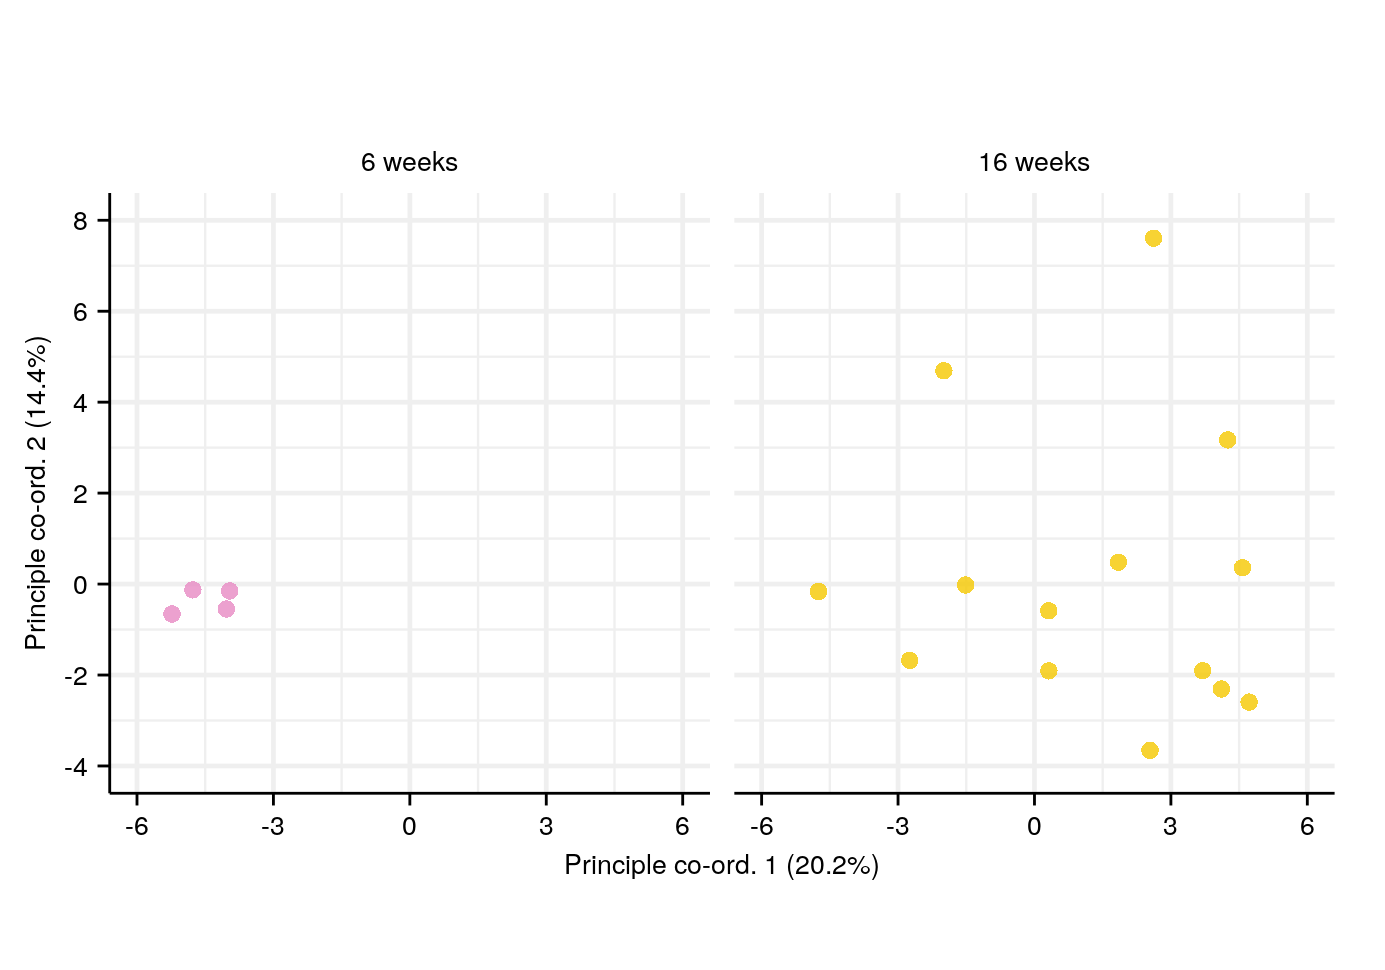

Supplement: supp [file elife-65117-supp-v1.zip › elife_poa_e65117_Figure_4_figure_supplement_4.png]

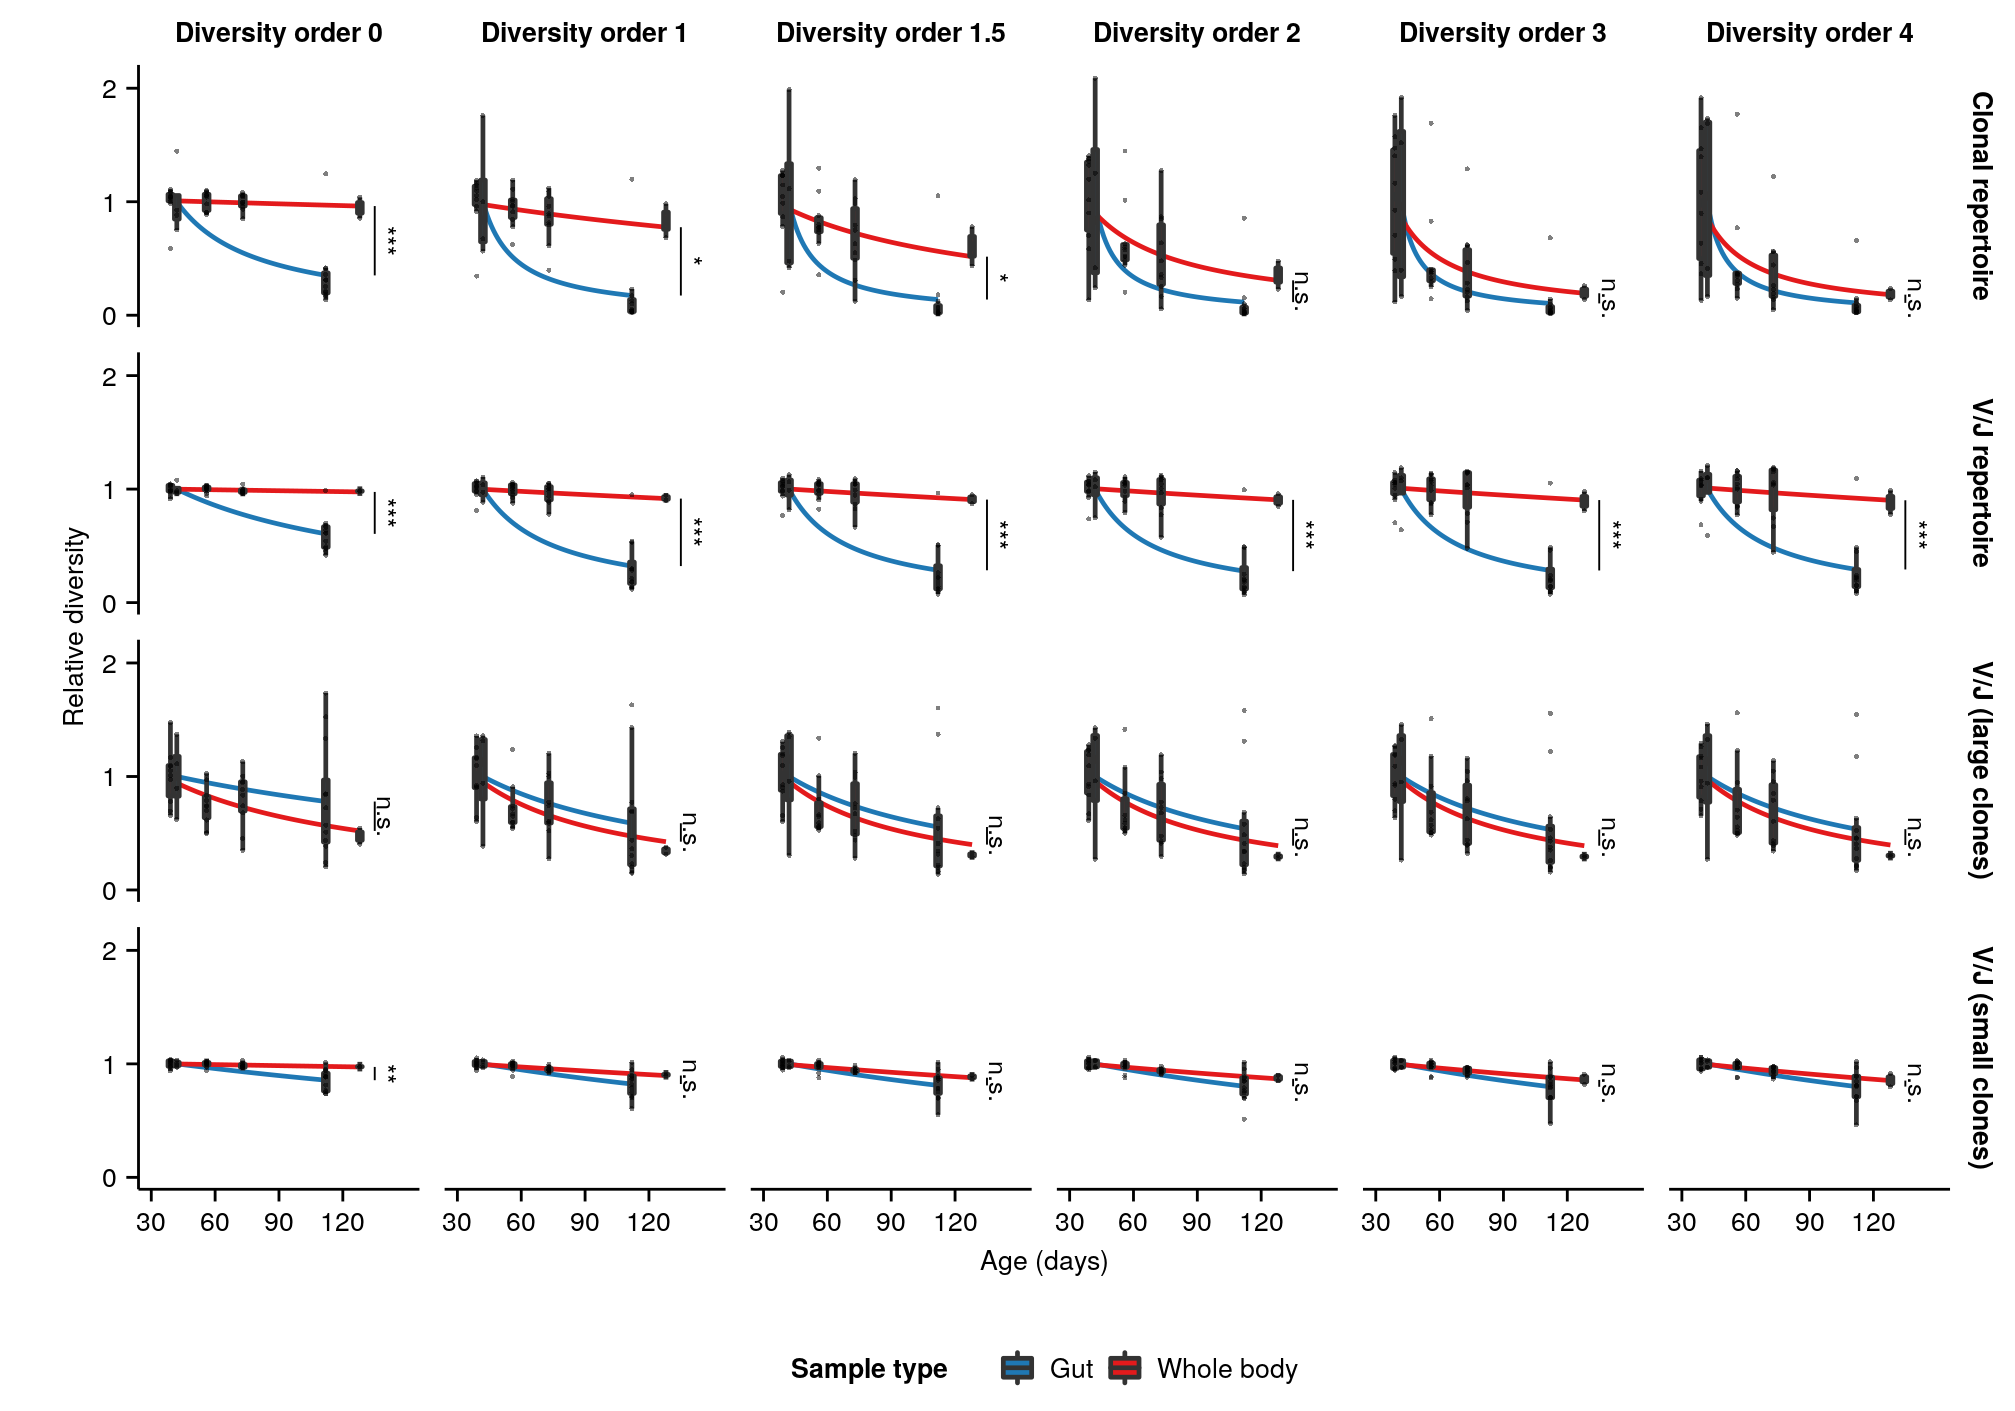

Supplement: supp [file elife-65117-supp-v1.zip › elife_poa_e65117_Figure_5_figure_supplement_1.png]

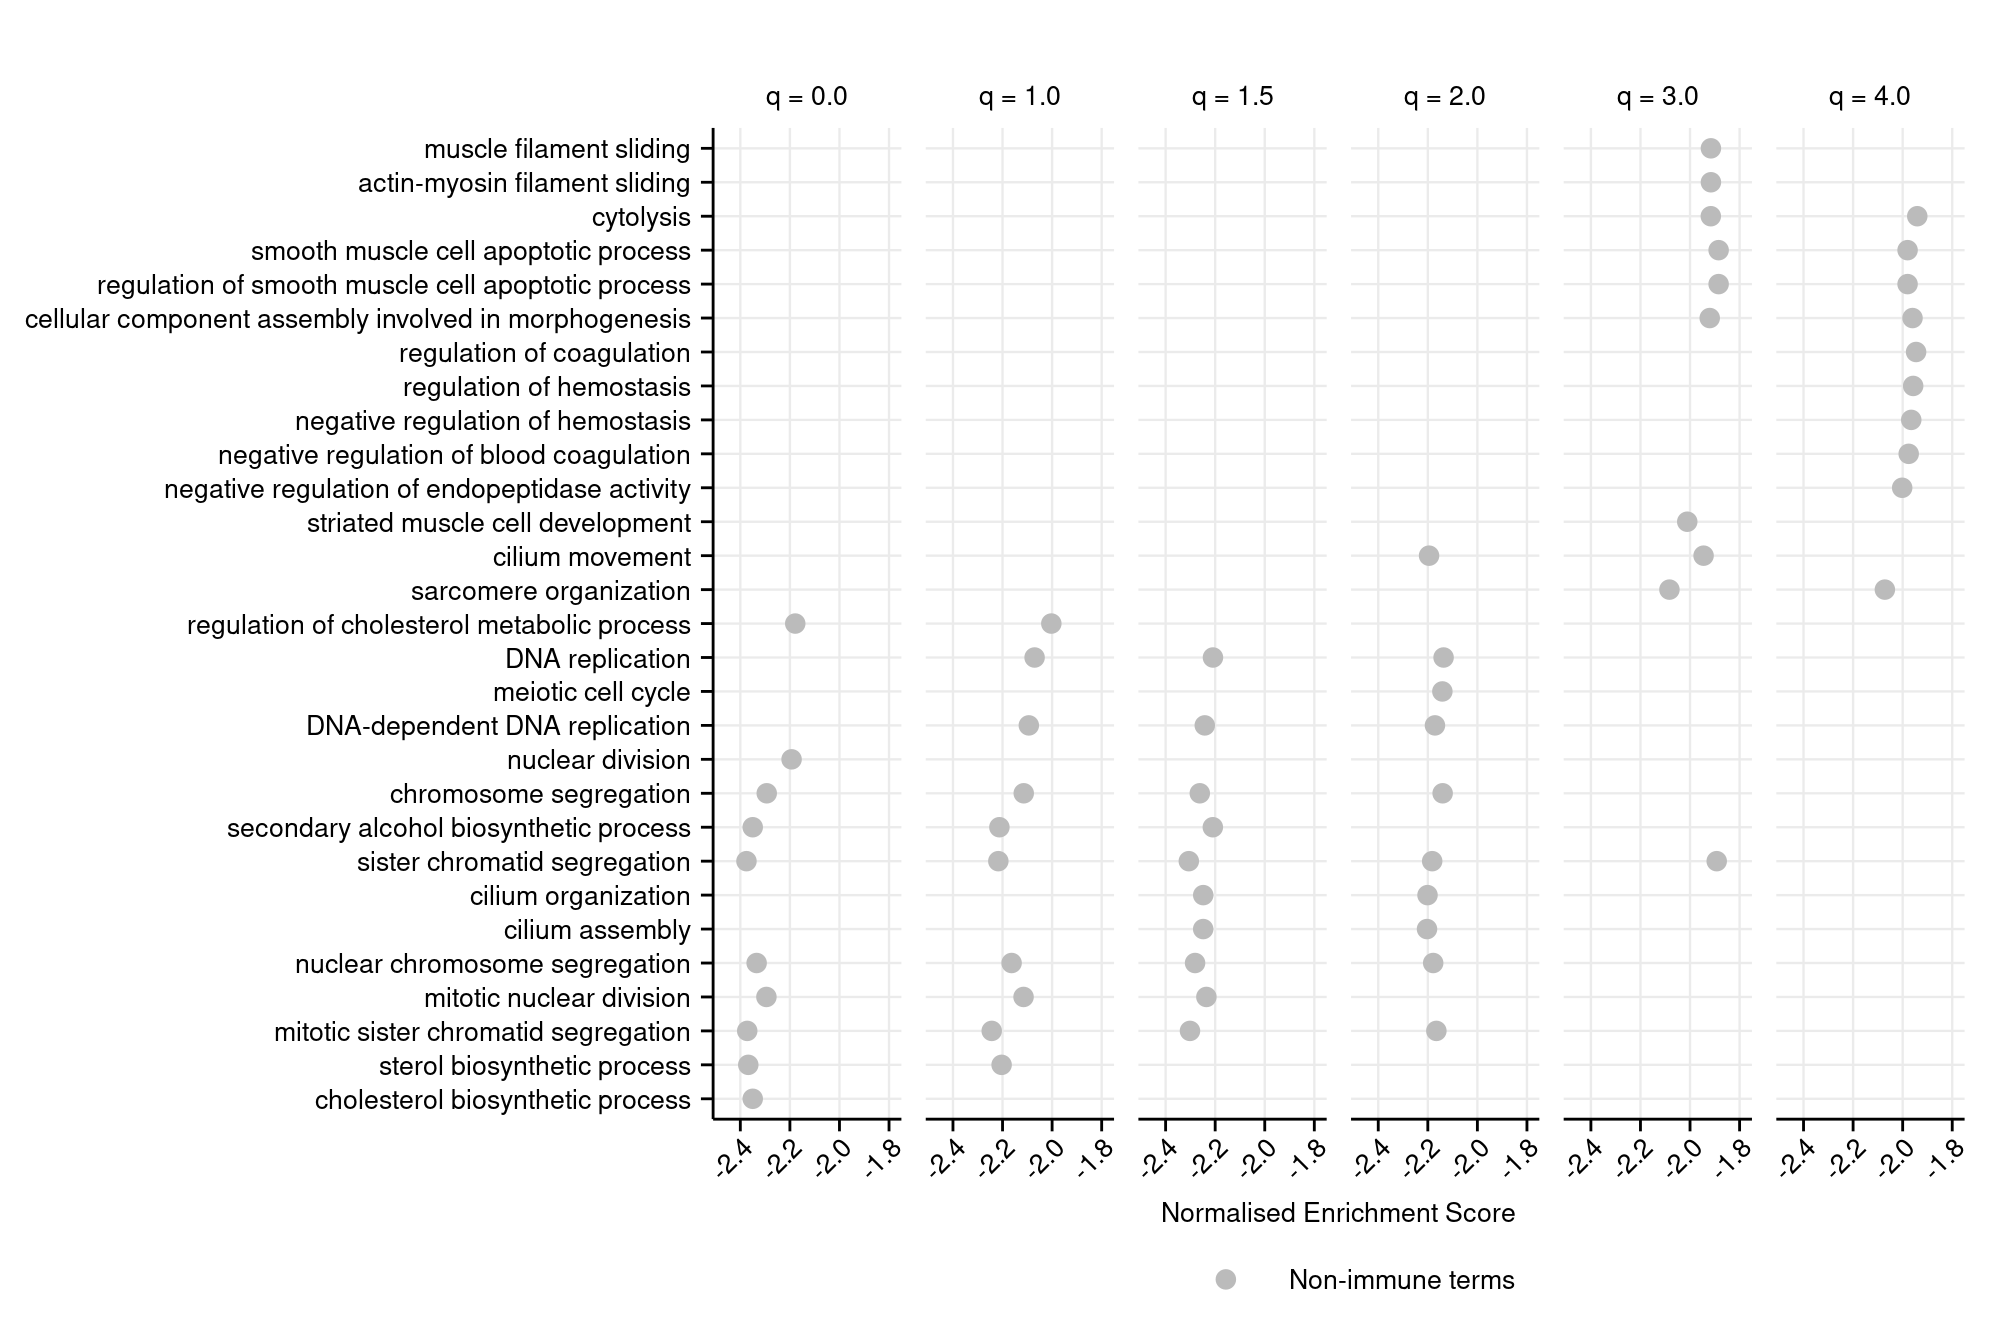

Supplement: supp [file elife-65117-supp-v1.zip › elife_poa_e65117_Figure_6_figure_supplement_1.png]

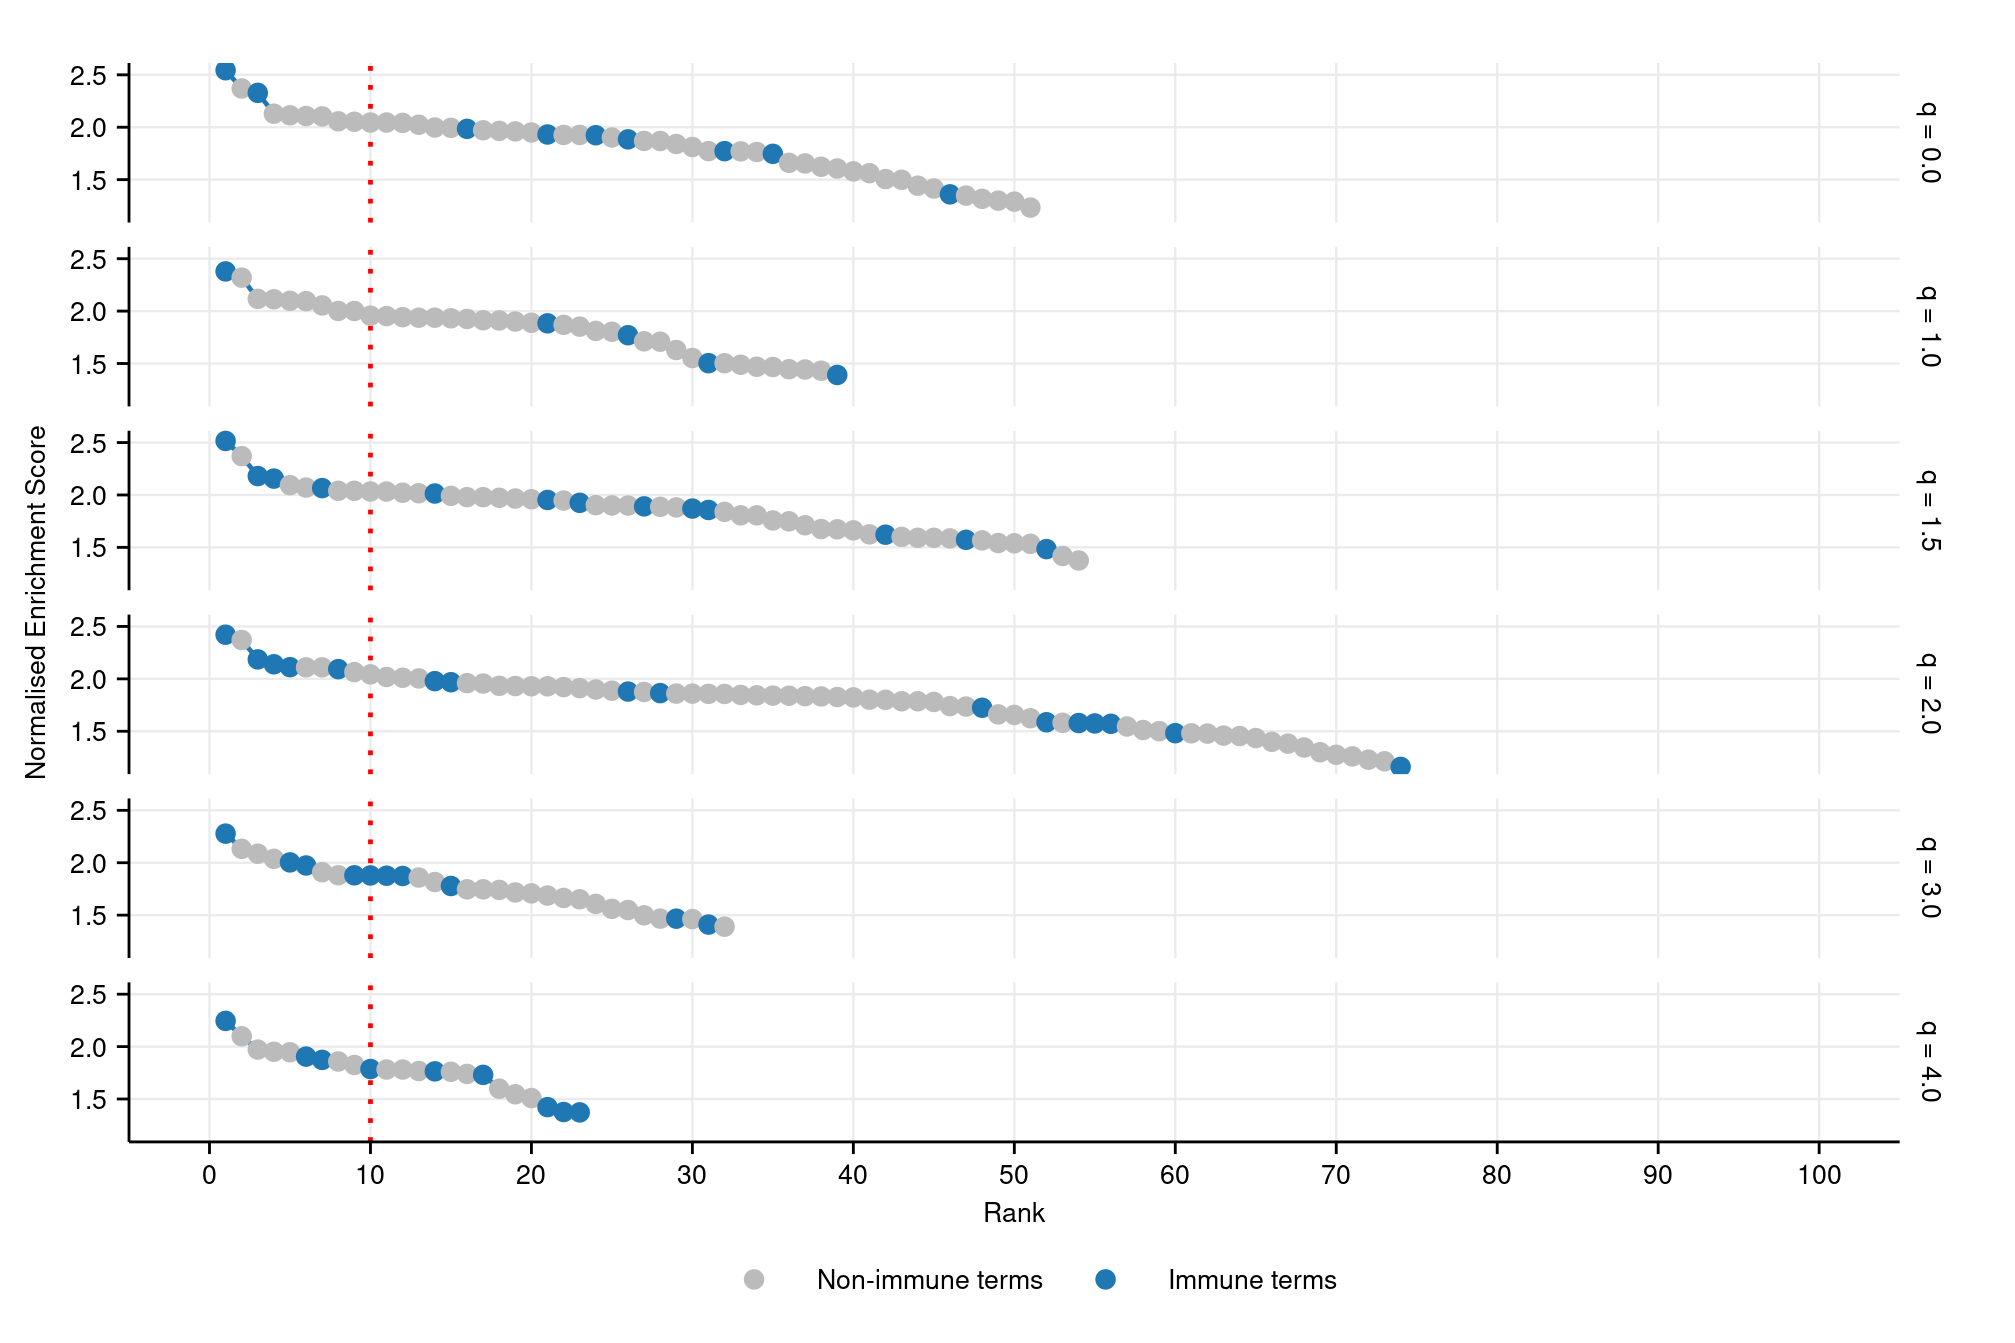

Supplement: supp [file elife-65117-supp-v1.zip › elife_poa_e65117_Figure_6_figure_supplement_2.png]

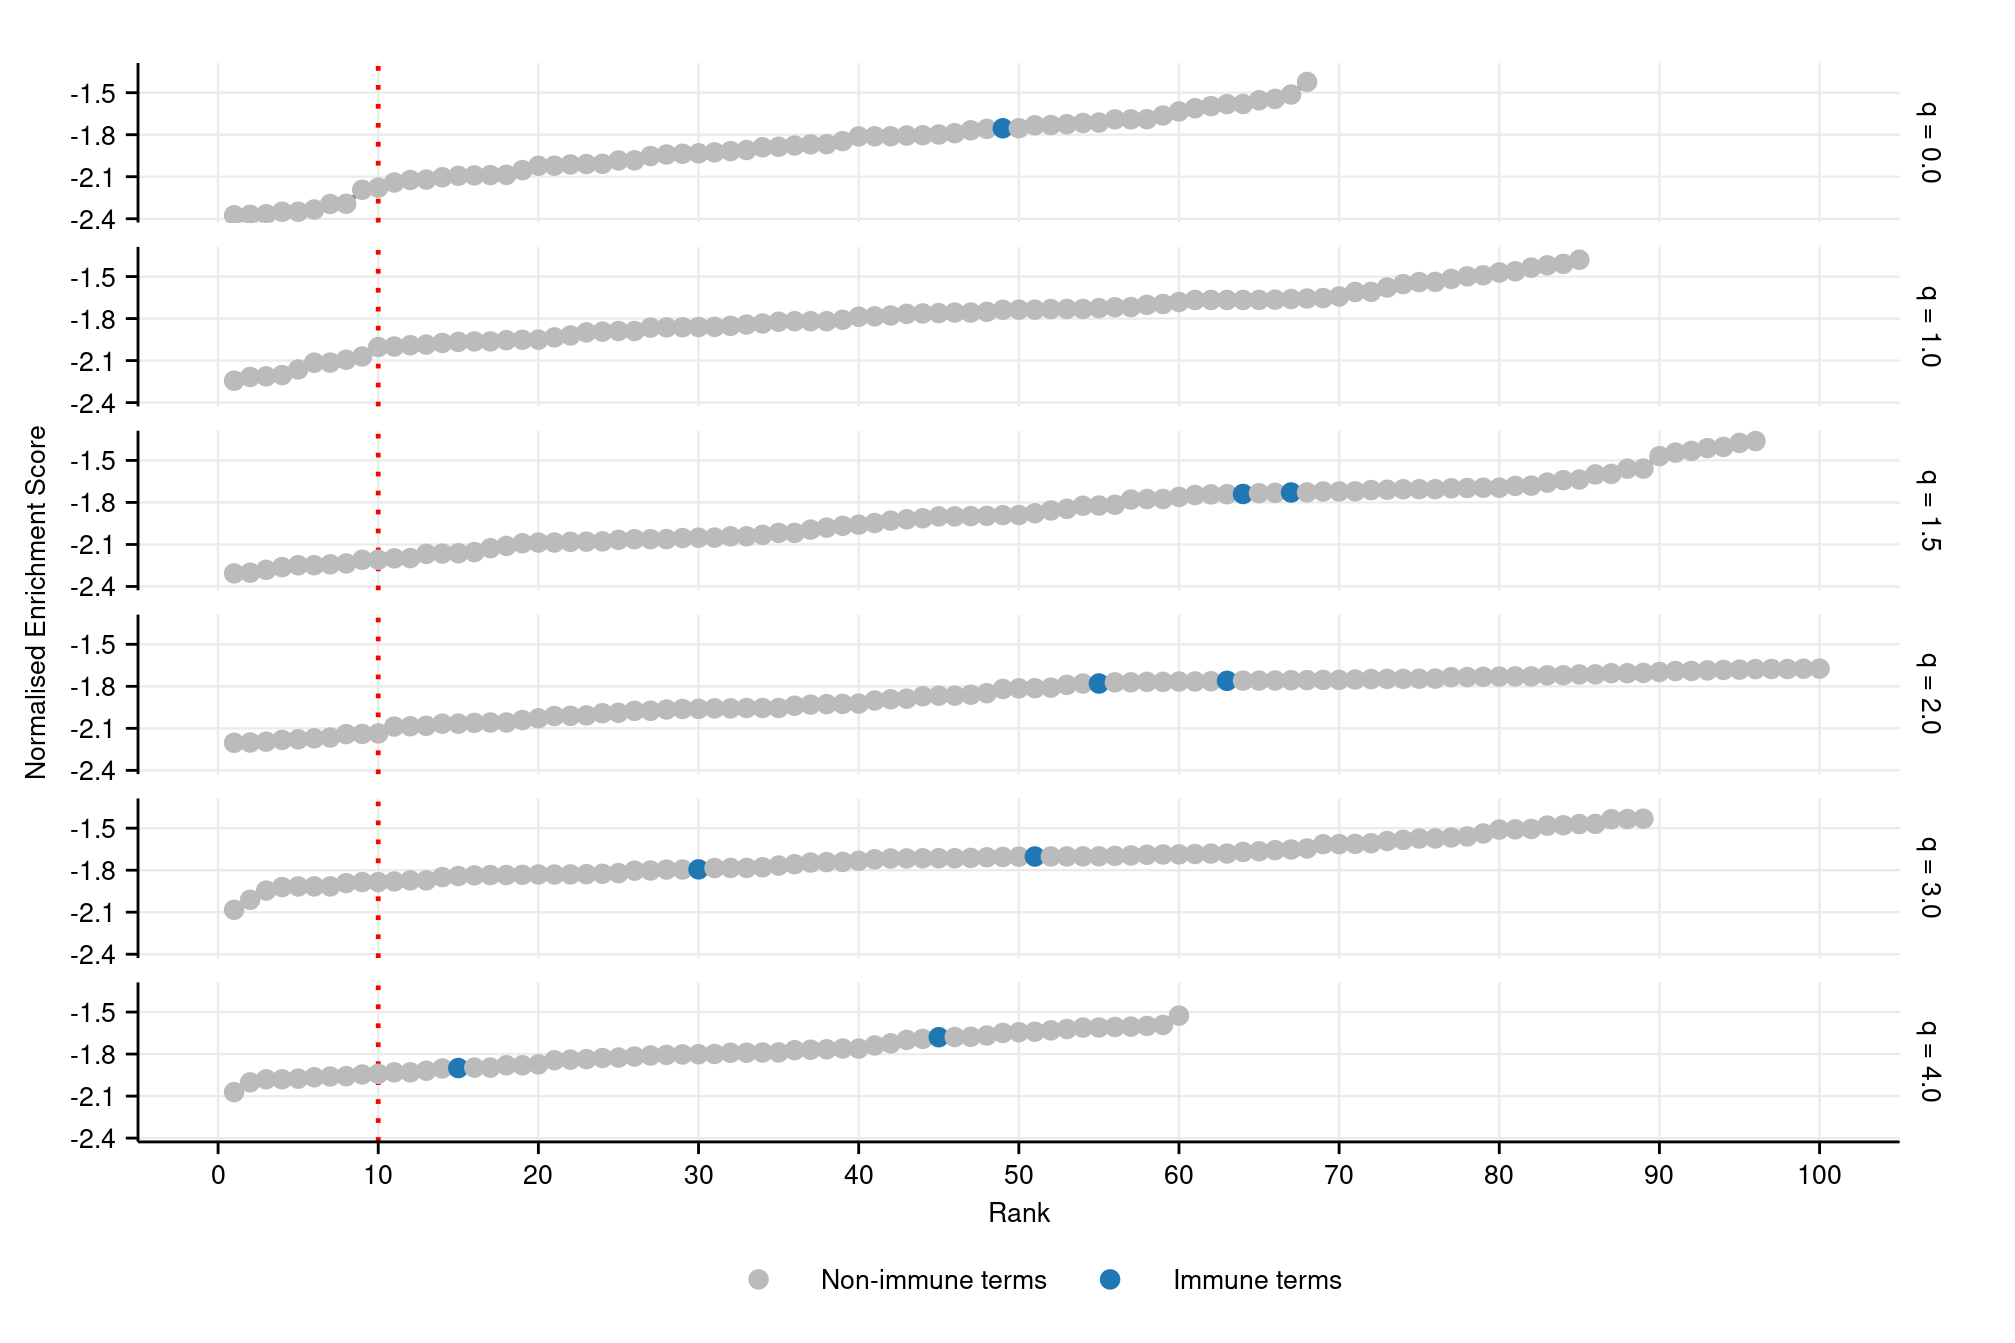

Supplement: supp [file elife-65117-supp-v1.zip › elife_poa_e65117_Figure_6_figure_supplement_3.png]
